# Supplementary material for: Direct measurement of particle inertial migration in rectangular microchannels
Source: Royal Society of Chemistry journal article supplement (doi:10.1039/c6lc00314a), 2016-01-01
Supplement: c6lc00314a1.pdf [file c6lc00314a1.pdf]

| x0         | y0         | c4x         | c4y          | c5x          | c5y           | Sxx          | Sxy         | Syx         | Syy         |
|------------|------------|-------------|--------------|--------------|---------------|--------------|-------------|-------------|-------------|
| 0.00000000 | 0.00000000 | 0.00000000  | 0.00000000   | 0.00000000   | 0.00000000    | 0.00000000   | 0.00000000  | 0.00000000  | 0.00000000  |
| 0.00000000 | 0.03125000 | 0.00000000  | 1.38651986   | 0.00000000   | -5.37548112   | 0.00000000   | -0.00003734 | 0.00000000  | 0.00000000  |
| 0.00000000 | 0.06250000 | 0.00000000  | 2.69023813   | 0.00000000   | -10.85944171  | 0.00000000   | 0.00000958  | 0.00000000  | 0.00000000  |
| 0.00000000 | 0.09375000 | 0.00000000  | 3.82862399   | 0.00000000   | -16.58261266  | 0.00000000   | 0.00005498  | 0.00000000  | 0.00000000  |
| 0.00000000 | 0.12500000 | 0.00000000  | 4.72090735   | 0.00000000   | -22.71655838  | 0.00000000   | -0.00014661 | 0.00000000  | 0.00000000  |
| 0.00000000 | 0.15625000 | 0.00000000  | 5.29684477   | 0.00000000   | -29.47875065  | 0.00000000   | -0.00013666 | 0.00000000  | 0.00000000  |
| 0.00000000 | 0.18750000 | 0.00000000  | 5.50251014   | 0.00000000   | -37.14417408  | 0.00000000   | -0.00006830 | 0.00000000  | 0.00000000  |
| 0.00000000 | 0.21875000 | 0.00000000  | 5.20216240   | 0.00000000   | -46.45813482  | 0.00000000   | -0.00016767 | 0.00000000  | 0.00000000  |
| 0.00000000 | 0.25000000 | 0.00000000  | 4.34065756   | 0.00000000   | -58.21799094  | 0.00000000   | 0.00018218  | 0.00000000  | 0.00000000  |
| 0.00000000 | 0.28125000 | 0.00000000  | 3.13999816   | 0.00000000   | -72.22572784  | 0.00000000   | -0.00027804 | 0.00000000  | 0.00000000  |
| 0.00000000 | 0.31250000 | 0.00000000  | 1.03567889   | 0.00000000   | -92.94792832  | 0.00000000   | -0.00056303 | 0.00000000  | 0.00000000  |
| 0.00000000 | 0.34375000 | 0.00000000  | -1.85194981  | 0.00000000   | -123.46180814 | 0.00000000   | 0.00043162  | 0.00000000  | 0.00000000  |
| 0.00000000 | 0.37500000 | 0.00000000  | -5.24757888  | 0.00000000   | -168.46596463 | 0.00000000   | -0.00132571 | 0.00000000  | 0.00000000  |
| 0.00000000 | 0.40625000 | 0.00000000  | -9.66664449  | 0.00000000   | -248.46223159 | 0.00000000   | -0.00313948 | 0.00000000  | 0.00000000  |
| 0.00000000 | 0.43750000 | 0.00000000  | -15.41744432 | 0.00000000   | -419.77531145 | 0.00000000   | -0.01065841 | 0.00000000  | 0.00000000  |
| 0.00000000 | 0.46875000 | 0.00000000  | -13.43766820 | 0.00000000   | -587.85356892 | 0.00000000   | -0.39522621 | 0.00000000  | 0.00000000  |
| 0.03125000 | 0.00000000 | 0.11334969  | 0.00000000   | -0.29839831  | 0.00000000    | -2.39386700  | 0.00000000  | 0.00002137  | 0.00000000  |
| 0.03125000 | 0.03125000 | 0.11037964  | 1.38692363   | -0.29563364  | -5.36625037   | -2.39605782  | -0.00024172 | -0.00022661 | 0.00000000  |
| 0.03125000 | 0.06250000 | 0.10267825  | 2.69063851   | -0.28425579  | -10.84349466  | -2.40666232  | -0.00028412 | -0.00033455 | 0.00000000  |
| 0.03125000 | 0.09375000 | 0.08759226  | 3.85201631   | -0.27145916  | -16.48779875  | -2.42629412  | -0.00060219 | -0.00068011 | 0.00000000  |
| 0.03125000 | 0.12500000 | 0.07195574  | 4.72111181   | -0.24190233  | -22.68244200  | -2.45747850  | -0.00055508 | -0.00077359 | 0.00000000  |
| 0.03125000 | 0.15625000 | 0.04758876  | 5.29624873   | -0.21747986  | -29.44197537  | -2.50493774  | -0.00072446 | -0.00074859 | 0.00000000  |
| 0.03125000 | 0.18750000 | 0.02236418  | 5.48930563   | -0.18162017  | -37.14618817  | -2.57517716  | -0.00064436 | -0.00062394 | 0.00000000  |
| 0.03125000 | 0.21875000 | 0.00259009  | 5.17339166   | -0.12100949  | -46.52117624  | -2.67871029  | -0.00075686 | -0.00118448 | 0.00000000  |
| 0.03125000 | 0.25000000 | -0.03981865 | 4.41508528   | -0.11738285  | -57.82406507  | -2.82758899  | -0.00045945 | -0.00048405 | 0.00000000  |
| 0.03125000 | 0.28125000 | -0.11154590 | 3.06755261   | -0.21204449  | -72.52998844  | -3.04954921  | -0.00083423 | -0.00032289 | 0.00000000  |
| 0.03125000 | 0.31250000 | -0.13900735 | 0.98964602   | -0.20096104  | -93.15442893  | -3.37684613  | -0.00061635 | -0.00037716 | 0.00000000  |
| 0.03125000 | 0.34375000 | -0.16220795 | -2.09126776  | -0.21643268  | -125.09032361 | -3.88448357  | -0.00134348 | 0.00073620  | 0.00000000  |
| 0.03125000 | 0.37500000 | -0.13659668 | -5.43918456  | -0.07994135  | -170.06948034 | -4.69297897  | -0.00412668 | -0.00251107 | 0.00000000  |
| 0.03125000 | 0.40625000 | -0.22823608 | -9.83823877  | -0.68518891  | -250.23688222 | -6.10418379  | 0.00132194  | -0.00035886 | 0.00000000  |
| 0.03125000 | 0.43750000 | -0.34124241 | -15.16244021 | -2.21396555  | -413.45789245 | -8.98337098  | -0.01970619 | 0.00030466  | 0.00000000  |
| 0.03125000 | 0.46875000 | -3.67016497 | -21.72133659 | -60.60560585 | -837.96275500 | -16.78248185 | 0.08426399  | 0.10084766  | 0.00000000  |
| 0.06250000 | 0.00000000 | 0.22767716  | 0.00000000   | -0.60134527  | 0.00000000    | -2.39830016  | 0.00000000  | 0.00001862  | -2.92938017 |
| 0.06250000 | 0.03125000 | 0.22217353  | 1.38260318   | -0.59473318  | -5.35009824   | -2.40035931  | -0.00044104 | -0.00039783 | -2.92825228 |
| 0.06250000 | 0.06250000 | 0.20587202  | 2.68290572   | -0.57389434  | -10.80533821  | -2.41114308  | -0.00096947 | -0.00081967 | -2.92816427 |
| 0.06250000 | 0.09375000 | 0.17864760  | 3.81657863   | -0.54086522  | -16.50734840  | -2.43054242  | -0.00136411 | -0.00124375 | -2.93011825 |
| 0.06250000 | 0.12500000 | 0.14329877  | 4.71004169   | -0.49118454  | -22.60511387  | -2.46186142  | -0.00162578 | -0.00161280 | -2.93238311 |
| 0.06250000 | 0.15625000 | 0.08835790  | 5.28063776   | -0.45743596  | -29.35898964  | -2.50879669  | -0.00165078 | -0.00169922 | -2.93660897 |
| 0.06250000 | 0.18750000 | 0.04257332  | 5.46507928   | -0.37343752  | -37.07398126  | -2.57910240  | -0.00135913 | -0.00167984 | -2.94127104 |
| 0.06250000 | 0.21875000 | -0.02700451 | 5.14099729   | -0.33207524  | -46.48118418  | -2.68195976  | -0.00159394 | -0.00150607 | -2.94737658 |
| 0.06250000 | 0.25000000 | -0.12095578 | 4.34319698   | -0.35467372  | -57.96292883  | -2.83176487  | -0.00165729 | -0.00121607 | -2.95508102 |
| 0.06250000 | 0.28125000 | -0.10860379 | 3.12288868   | -0.07642974  | -72.05065610  | -3.05134903  | -0.00155752 | -0.00063611 | -2.96460152 |
| 0.06250000 | 0.31250000 | -0.21980285 | 1.18815090   | -0.20602995  | -91.74332701  | -3.38035149  | -0.00358325 | -0.00175653 | -2.97617288 |
| 0.06250000 | 0.34375000 | -0.33157099 | -1.87200110  | -0.46017449  | -123.30758858 | -3.88760626  | -0.00279730 | -0.00135287 | -2.99110644 |
| 0.06250000 | 0.37500000 | -0.43463999 | -5.21703806  | -0.91702822  | -167.91107925 | -4.69863721  | 0.00142423  | -0.00116824 | -3.00861532 |
| 0.06250000 | 0.40625000 | -0.45698643 | -9.81755361  | -1.37321670  | -249.92806484 | -6.11323750  | -0.00471719 | -0.00333133 | -3.02956682 |
| 0.06250000 | 0.43750000 | -0.51398060 | -15.79779452 | -2.90211267  | -424.62329424 | -8.97127056  | -0.01757436 | 0.00750637  | -3.05435848 |
| 0.06250000 | 0.46875000 | -0.53827694 | -24.67669212 | -6.95948396  | -919.64299687 | -16.61681680 | 0.01997322  | -0.24257529 | -3.08414284 |
| 0.09375000 | 0.00000000 | 0.34350729  | 0.00000000   | -0.91456311  | 0.00000000    | -2.40584162  | 0.00000000  | 0.00000529  | -3.11812458 |
| 0.09375000 | 0.03125000 | 0.33580336  | 1.37505683   | -0.90313760  | -5.32100495   | -2.40794865  | -0.00070375 | -0.00070679 | -3.15681099 |
| 0.09375000 | 0.06250000 | 0.31273981  | 2.66934732   | -0.86806456  | -10.74522947  | -2.41857834  | -0.00145401 | -0.00143904 | -3.20161060 |
| 0.09375000 | 0.09375000 | 0.27014756  | 3.79764478   | -0.82199224  | -16.41898172  | -2.43775517  | -0.00203919 | -0.00207282 | -3.25141042 |
| 0.09375000 | 0.12500000 | 0.21337744  | 4.68622155   | -0.75557753  | -22.48809398  | -2.46879470  | -0.00225068 | -0.00257485 | -3.30731856 |
| 0.09375000 | 0.15625000 | 0.13819718  | 5.26309271   | -0.68545949  | -29.18349900  | -2.51590720  | -0.00263430 | -0.00277577 | -3.37069333 |
| 0.09375000 | 0.18750000 | 0.05803555  | 5.44282567   | -0.58699469  | -36.88866666  | -2.58540510  | -0.00281273 | -0.00265639 | -3.44343104 |
| 0.09375000 | 0.21875000 | -0.05382709 | 5.13783506   | -0.54364775  | -46.19950185  | -2.68726577  | -0.00304125 | -0.00205028 | -3.53207866 |
| 0.09375000 | 0.25000000 | -0.08885627 | 4.46056527   | -0.27686086  | -57.10015871  | -2.83686538  | -0.00285913 | -0.00272267 | -3.64528516 |
| 0.09375000 | 0.28125000 | -0.19830514 | 3.14835513   | -0.22651617  | -71.57474282  | -3.05405487  | -0.00306619 | -0.00182314 | -3.80288366 |
| 0.09375000 | 0.31250000 | -0.30920692 | 1.05535748   | -0.24023520  | -92.18180164  | -3.38230767  | -0.00263191 | -0.00148208 | -4.03975557 |

|            |            |             |              |              |                |              |             |             |              |
|------------|------------|-------------|--------------|--------------|----------------|--------------|-------------|-------------|--------------|
| 0.09375000 | 0.34375000 | -0.48888557 | -1.69615458  | -0.65393612  | -121.65221778  | -3.88826748  | -0.00082104 | -0.00283000 | -4.43170372  |
| 0.09375000 | 0.37500000 | -0.64899560 | -5.11713002  | -1.35215691  | -166.58443013  | -4.69544148  | 0.00029546  | -0.00149893 | -5.09831968  |
| 0.09375000 | 0.40625000 | -0.54614215 | -9.94685154  | -1.19763051  | -251.106805419 | -6.11443662  | 0.00223054  | -0.00199227 | -6.38141925  |
| 0.09375000 | 0.43750000 | -0.94497905 | -15.62778812 | -5.91403691  | -422.27337038  | -8.98653071  | 0.01094042  | 0.02843494  | -9.14823598  |
| 0.09375000 | 0.46875000 | -0.47812354 | -24.07803436 | -4.87671720  | -887.06574157  | -16.46479901 | 0.52712650  | 0.75435790  | -16.12177539 |
| 0.12500000 | 0.00000000 | 0.46367751  | 0.00000000   | -1.23847584  | 0.00000000     | -2.41650230  | 0.00000000  | 0.00004485  | -2.99058787  |
| 0.12500000 | 0.03125000 | 0.45210945  | 1.36560347   | -1.22616914  | -5.27708620    | -2.41836736  | -0.00104074 | -0.00121025 | -2.98898276  |
| 0.12500000 | 0.06250000 | 0.41895635  | 2.64961525   | -1.18430997  | -10.66411259   | -10.42890878 | -0.00214332 | -0.00218531 | -2.99043200  |
| 0.12500000 | 0.09375000 | 0.36497670  | 3.77127357   | -1.11444102  | -16.28953618   | -2.44823883  | -0.00288715 | -0.00299557 | -2.99209227  |
| 0.12500000 | 0.12500000 | 0.28940198  | 4.65466645   | -1.02358806  | -22.32124267   | -2.47860610  | -0.00360142 | -0.00359110 | -2.99368141  |
| 0.12500000 | 0.15625000 | 0.18408592  | 5.22159580   | -0.94018980  | -29.00272368   | -2.52503244  | -0.00428666 | -0.00385924 | -2.99733005  |
| 0.12500000 | 0.18750000 | 0.08908519  | 5.42138684   | -0.77479824  | -36.59412053   | -2.59387645  | -0.00368439 | -0.00360625 | -3.00160860  |
| 0.12500000 | 0.21875000 | -0.04816948 | 5.13965856   | -0.68002445  | -45.75876384   | -2.69580667  | -0.00424786 | -0.00409087 | -3.00739337  |
| 0.12500000 | 0.25000000 | -0.16312936 | 4.30982352   | -0.50973966  | -57.31218650   | -2.88965221  | -0.00362888 | -0.00392018 | -3.01490889  |
| 0.12500000 | 0.28125000 | -0.33324749 | 3.06714336   | -0.52159409  | -71.49445358   | -3.06248893  | -0.00438124 | -0.00376673 | -3.02440170  |
| 0.12500000 | 0.31250000 | -0.49368167 | 1.23520209   | -0.59941764  | -90.58924995   | -3.38983875  | -0.00326371 | -0.00450703 | -3.03593045  |
| 0.12500000 | 0.34375000 | -0.60161465 | -1.78328328  | -0.67075239  | -121.73811729  | -3.88969339  | -0.00426938 | -0.00241167 | -3.04980299  |
| 0.12500000 | 0.37500000 | -0.76174803 | -5.24771170  | -1.30644596  | -167.25296806  | -4.70005444  | 0.00058881  | -0.00041610 | -3.06626178  |
| 0.12500000 | 0.40625000 | -0.81590670 | -9.79196583  | -2.11360184  | -248.70748363  | -6.11554053  | -0.00384501 | -0.00419950 | -3.08639250  |
| 0.12500000 | 0.43750000 | -1.07918268 | -15.36063481 | -6.26248675  | -417.04977135  | -9.01339067  | -0.01103756 | 0.01131725  | -3.11038736  |
| 0.12500000 | 0.46875000 | -2.23818526 | -23.11617090 | -32.78782802 | -827.85742139  | -16.44879527 | 0.05137158  | -0.03168416 | -3.13892081  |
| 0.15625000 | 0.00000000 | 0.58518793  | 0.00000000   | -1.58793484  | 0.00000000     | -2.43043729  | 0.00000000  | -0.00002745 | -3.17238456  |
| 0.15625000 | 0.03125000 | 0.57157142  | 1.35138151   | -1.56991401  | -5.22390851    | -2.43249148  | -0.00153021 | -0.00155997 | -3.21014615  |
| 0.15625000 | 0.06250000 | 0.52974197  | 2.62288145   | -1.51723349  | -10.55766226   | -2.44269708  | -0.00309781 | -0.00308941 | -3.25461215  |
| 0.15625000 | 0.09375000 | 0.46332222  | 3.73082329   | -1.42495848  | -16.14225938   | -2.46168685  | -0.00434135 | -0.00404217 | -3.30402171  |
| 0.15625000 | 0.12500000 | 0.36567097  | 4.61234569   | -1.31590121  | -22.10606610   | -2.49173695  | -0.00531210 | -0.00535801 | -3.35996566  |
| 0.15625000 | 0.15625000 | 0.23983855  | 5.19561885   | -1.19270895  | -28.66170040   | -2.53779658  | -0.00566140 | -0.00587787 | -3.42421723  |
| 0.15625000 | 0.18750000 | 0.10229082  | 5.36521316   | -1.02886372  | -36.30117468   | -2.60623369  | -0.00591651 | -0.00604037 | -3.49805916  |
| 0.15625000 | 0.21875000 | -0.03798216 | 5.08885956   | -0.82056909  | -45.41760148   | -2.70672353  | -0.00635090 | -0.00574072 | -3.58693566  |
| 0.15625000 | 0.25000000 | -0.23855229 | 4.34516895   | -0.75901977  | -56.55293715   | -2.85445468  | -0.00490978 | -0.00446772 | -3.70007099  |
| 0.15625000 | 0.28125000 | -0.37208977 | 3.11476152   | -0.53006203  | -70.61490348   | -3.07074128  | -0.00456267 | -0.00409729 | -3.85714917  |
| 0.15625000 | 0.31250000 | -0.60467547 | 1.19701160   | -0.71218881  | -90.15150435   | -3.39702399  | -0.00357889 | -0.00273967 | -4.09454976  |
| 0.15625000 | 0.34375000 | -0.85598300 | -1.53723682  | -1.23617628  | -119.28454407  | -3.89389085  | -0.00167984 | -0.00409632 | -4.47428015  |
| 0.15625000 | 0.37500000 | -0.91936845 | -5.14198648  | -1.45644272  | -165.55775035  | -4.69902378  | -0.00191278 | 0.00137525  | -5.14514231  |
| 0.15625000 | 0.40625000 | -1.06979058 | -9.21285420  | -2.90939376  | -240.91075822  | -6.11066767  | -0.00592551 | -0.00197098 | -6.40938841  |
| 0.15625000 | 0.43750000 | -1.40883141 | -14.89652060 | -8.31302262  | -408.33312194  | -8.00555903  | 0.01181789  | 0.00789737  | -9.16589430  |
| 0.15625000 | 0.46875000 | -5.51450281 | -15.53176486 | -88.64739581 | -662.40122232  | -16.99806493 | -0.14802932 | 0.29582493  | -16.65743112 |
| 0.18750000 | 0.00000000 | 0.71399443  | 0.00000000   | -1.95657210  | 0.00000000     | -2.44787626  | 0.00000000  | -0.00003441 | -3.09530997  |
| 0.18750000 | 0.03125000 | 0.69598787  | 1.33443937   | -1.93837525  | -5.15681574    | -2.44983151  | -0.00224480 | -0.00232007 | -3.09380253  |
| 0.18750000 | 0.06250000 | 0.64020528  | 2.58825984   | -1.88679043  | -10.43087400   | -2.45993383  | -0.00438100 | -0.00422539 | -3.09516072  |
| 0.18750000 | 0.09375000 | 0.55810137  | 3.70146912   | -1.77864086  | -15.89496284   | -2.47852016  | -0.00612996 | -0.00609870 | -3.09636962  |
| 0.18750000 | 0.12500000 | 0.44888745  | 4.55609062   | -1.62308999  | -21.84771650   | -2.50819108  | -0.00723665 | -0.00730191 | -3.09900339  |
| 0.18750000 | 0.15625000 | 0.31265562  | 5.09123591   | -1.43117774  | -28.49269094   | -2.55356542  | -0.00785114 | -0.00799934 | -3.10190525  |
| 0.18750000 | 0.18750000 | 0.13500712  | 5.32693005   | -1.25827679  | -35.83335641   | -2.62110781  | -0.00787058 | -0.00834874 | -3.10555578  |
| 0.18750000 | 0.21875000 | -0.07597393 | 5.04956753   | -1.11373593  | -44.88373181   | -2.72128776  | -0.00781139 | -0.00740640 | -3.11075728  |
| 0.18750000 | 0.25000000 | -0.28197550 | 4.30535525   | -0.93451446  | -55.98215633   | -2.86724163  | -0.00694733 | -0.00640264 | -3.11674824  |
| 0.18750000 | 0.28125000 | -0.53431113 | 3.01141995   | -0.92955327  | -70.34385476   | -3.08217592  | -0.00524433 | -0.00641252 | -3.12657163  |
| 0.18750000 | 0.31250000 | -0.71186784 | 0.91361158   | -0.81274347  | -91.03017057   | -3.40068073  | -0.00674886 | -0.00445379 | -3.13643255  |
| 0.18750000 | 0.34375000 | -0.98902741 | -1.77559293  | -1.32917035  | -120.15538425  | -3.90233861  | -0.00639228 | -0.00267732 | -3.14998560  |
| 0.18750000 | 0.37500000 | -1.08753585 | -4.84656531  | -1.65088517  | -162.05561612  | -4.70599926  | -0.00166257 | -0.00121115 | -3.16591495  |
| 0.18750000 | 0.40625000 | -1.30514389 | -9.28378104  | -3.58398658  | -241.07150215  | -6.11771523  | -0.00054498 | -0.00073269 | -3.18496218  |
| 0.18750000 | 0.43750000 | -1.49752797 | -14.33217313 | -8.16912739  | -396.73571065  | -9.00265211  | -0.04027927 | -0.00624845 | -3.20688841  |
| 0.18750000 | 0.46875000 | 1.17793911  | -20.22808547 | 25.94840686  | -772.60214189  | -16.77787466 | 0.35800823  | 0.200114455 | -3.23382610  |
| 0.21875000 | 0.00000000 | 0.84622029  | 0.00000000   | -2.36262272  | 0.00000000     | -2.46899032  | 0.00000000  | -0.00001613 | -3.26594842  |
| 0.21875000 | 0.03125000 | 0.82550649  | 1.31423888   | -2.33980362  | -5.07513723    | -2.47084476  | -0.00305342 | -0.00299395 | -3.30292012  |
| 0.21875000 | 0.06250000 | 0.76684705  | 2.55218865   | -2.26097245  | -10.26034289   | -2.48077616  | -0.00579711 | -0.00569881 | -3.34574133  |
| 0.21875000 | 0.09375000 | 0.66660568  | 3.63523075   | -2.14101952  | -15.69094177   | -2.49901163  | -0.00813941 | -0.00801664 | -3.39563723  |
| 0.21875000 | 0.12500000 | 0.52840265  | 4.49372366   | -1.97963841  | -21.51341742   | -2.52855950  | -0.00985727 | -0.00966790 | -3.45129640  |
| 0.21875000 | 0.15625000 | 0.36235834  | 5.06235834   | -1.75666589  | -27.94768577   | -2.573306173 | -0.01085988 | -0.01056644 | -3.51516551  |
| 0.21875000 | 0.18750000 | 0.17536588  | 5.20928562   | -1.50017711  | -35.52568339   | -2.63994178  | -0.01120632 | -0.01093596 | -3.59075908  |

|            |            |             |              |              |               |              |             |             |              |
|------------|------------|-------------|--------------|--------------|---------------|--------------|-------------|-------------|--------------|
| 0.21875000 | 0.21875000 | -0.05193901 | 4.95034669   | -1.26606765  | -44.46759033  | -2.73797006  | -0.01067671 | -0.01038530 | -3.68089614  |
| 0.21875000 | 0.25000000 | -0.26808239 | 4.23264769   | -0.96684749  | -55.42631195  | -2.88239195  | -0.00858010 | -0.00920409 | -3.79546937  |
| 0.21875000 | 0.28125000 | -0.52762222 | 3.07089932   | -0.82288311  | -69.09079254  | -3.09491832  | -0.00833538 | -0.00709043 | -3.95162682  |
| 0.21875000 | 0.31250000 | -0.92705932 | 1.14722911   | -1.29624295  | -88.62643401  | -3.41649403  | -0.00692203 | -0.00490651 | -4.18481242  |
| 0.21875000 | 0.34375000 | -1.09693384 | -1.67950675  | -1.32582711  | -118.47034158 | -3.91594636  | -0.00746672 | -0.00422080 | -4.55645103  |
| 0.21875000 | 0.37500000 | -1.32444526 | -4.84156001  | -2.16065815  | -161.04951126 | -4.71623734  | -0.00610464 | -0.00507289 | -5.21595738  |
| 0.21875000 | 0.40625000 | -1.60118776 | -9.37301779  | -4.60584221  | -241.10042121 | -6.12285022  | -0.00477683 | 0.00000782  | -6.46132860  |
| 0.21875000 | 0.43750000 | -1.69158651 | -14.82017414 | -8.98539474  | -405.26121976 | -9.02713853  | -0.02682137 | -0.00574137 | -9.17614214  |
| 0.21875000 | 0.46875000 | 4.42041286  | -20.28568927 | 79.92565024  | -763.54673892 | -16.42410058 | -0.52877343 | -1.30781993 | -16.80290196 |
| 0.25000000 | 0.00000000 | 0.98140869  | 0.00000000   | -2.819696394 | 0.000000000   | -2.49407601  | 0.00000000  | 0.00000273  | -3.24849424  |
| 0.25000000 | 0.03125000 | 0.96070038  | 1.28872843   | -2.78220210  | -4.98370103   | -2.49597531  | -0.00407345 | -0.00406089 | -3.24776456  |
| 0.25000000 | 0.06250000 | 0.89153479  | 2.50444934   | -2.69368177  | -10.07414475  | -2.50574710  | -0.00782414 | -0.00767159 | -3.24824131  |
| 0.25000000 | 0.09375000 | 0.77668942  | 3.57192029   | -2.55104331  | -15.40295505  | -2.52381869  | -0.01076493 | -0.01084576 | -3.24998791  |
| 0.25000000 | 0.12500000 | 0.62500381  | 4.42274125   | -2.34214030  | -21.12287143  | -2.55254254  | -0.01304288 | -0.01309510 | -3.25133994  |
| 0.25000000 | 0.15625000 | 0.43319124  | 4.97213884   | -2.09055380  | -27.49432074  | -2.59669130  | -0.01405677 | -0.01408245 | -3.25357813  |
| 0.25000000 | 0.18750000 | 0.19663401  | 5.16368372   | -1.83317690  | -34.81771086  | -2.66238471  | -0.01478855 | -0.01443367 | -3.25718398  |
| 0.25000000 | 0.21875000 | -0.02493281 | 5.00085955   | -1.44417958  | -43.75807758  | -2.75807758  | -0.01341718 | -0.01346786 | -3.26299081  |
| 0.25000000 | 0.25000000 | -0.36883639 | 4.24610293   | -1.35837402  | -54.29564382  | -2.90193943  | -0.01176425 | -0.01218345 | -3.26746114  |
| 0.25000000 | 0.28125000 | -0.67896033 | 3.02593497   | -1.22620811  | -68.19921653  | -3.11211085  | -0.01073875 | -0.01050182 | -3.27564389  |
| 0.25000000 | 0.31250000 | -1.01328720 | 1.08150116   | -1.34757605  | -87.84846001  | -3.43040220  | -0.00931508 | -0.00896190 | -3.28518530  |
| 0.25000000 | 0.34375000 | -1.31828390 | -1.40314426  | -1.75876860  | -115.26360263 | -3.92418134  | -0.01267599 | -0.00741261 | -3.29717160  |
| 0.25000000 | 0.37500000 | -1.51860652 | -4.91246921  | -2.44919959  | -160.43381314 | -4.72156780  | -0.00389422 | -0.00607384 | -3.31178155  |
| 0.25000000 | 0.40625000 | -1.81593645 | -8.89401472  | -5.10474967  | -234.22814326 | -6.12799745  | -0.00498338 | -0.00673196 | -3.32953807  |
| 0.25000000 | 0.43750000 | -1.85919295 | -14.82568368 | -9.43729780  | -404.14719374 | -9.00202925  | -0.01421929 | 0.00660566  | -3.34944398  |
| 0.25000000 | 0.46875000 | -3.04121732 | -13.34315604 | -40.46864326 | -581.95692855 | -16.10590761 | -0.01511950 | 0.25671169  | -3.37512290  |
| 0.28125000 | 0.00000000 | 1.13368195  | 0.00000000   | -3.29487762  | 0.00000000    | -2.52347030  | 0.00000000  | 0.00003755  | -3.40478798  |
| 0.28125000 | 0.03125000 | 1.10352928  | 1.26099615   | -3.27148443  | -4.87195250   | -2.52529061  | -0.00519857 | -0.00512324 | -3.43941903  |
| 0.28125000 | 0.06250000 | 1.02381418  | 2.44537070   | -3.17174711  | -9.86845563   | -2.53516332  | -0.01010342 | -0.01010795 | -3.48114914  |
| 0.28125000 | 0.09375000 | 0.89622798  | 3.49491641   | -2.99934354  | -15.07793480  | -2.55292659  | -0.01414385 | -0.01409236 | -3.52784238  |
| 0.28125000 | 0.12500000 | 0.71970817  | 4.32324104   | -2.76806802  | -20.71375188  | -2.58127327  | -0.01716639 | -0.01708793 | -3.58340848  |
| 0.28125000 | 0.15625000 | 0.50679748  | 4.88762174   | -2.46285894  | -26.90505817  | -2.62480420  | -0.01888509 | -0.01881937 | -3.64790098  |
| 0.28125000 | 0.18750000 | 0.24098858  | 5.06859104   | -2.15437396  | -34.15587753  | -2.68921244  | -0.01930521 | -0.01940965 | -3.72511567  |
| 0.28125000 | 0.21875000 | -0.05572753 | 4.85183201   | -1.82514320  | -42.75582074  | -2.78428908  | -0.01863805 | -0.01779826 | -3.81759009  |
| 0.28125000 | 0.25000000 | -0.35182202 | 4.16662723   | -1.44364967  | -53.42051706  | -2.92494119  | -0.01671848 | -0.01571670 | -3.93385177  |
| 0.28125000 | 0.28125000 | -0.73620915 | 2.83644904   | -1.36440696  | -67.85832907  | -3.13317919  | -0.01420619 | -0.01320549 | -4.08835514  |
| 0.28125000 | 0.31250000 | -1.06722174 | 1.30571436   | -1.30247263  | -85.13519450  | -3.44749448  | -0.01190739 | -0.01048862 | -4.31482976  |
| 0.28125000 | 0.34375000 | -1.39299586 | -1.38637836  | -1.61760274  | -113.73815740 | -3.93440514  | -0.01136846 | -0.00599347 | -4.68299828  |
| 0.28125000 | 0.37500000 | -1.74283345 | -4.44322328  | -2.87597193  | -154.84390703 | -4.73329587  | -0.00664381 | -0.00568694 | -5.31750265  |
| 0.28125000 | 0.40625000 | -2.02868498 | -8.93860029  | -5.56500542  | -233.39834978 | -6.13402153  | -0.00596065 | -0.00226689 | -6.52828123  |
| 0.28125000 | 0.43750000 | -2.16312731 | -13.82119359 | -11.12223256 | -383.47153346 | -9.00199081  | -0.01502628 | -0.00127551 | -9.19797740  |
| 0.28125000 | 0.46875000 | -1.05263052 | -17.81002955 | -7.49796726  | -687.52629533 | -16.39243509 | -0.07255044 | -0.47000374 | -16.09462801 |
| 0.31250000 | 0.00000000 | 1.27997291  | 0.00000000   | -3.86607670  | 0.00000000    | -2.55768880  | 0.00000000  | -0.00000238 | -3.45710274  |
| 0.31250000 | 0.03125000 | 1.25074460  | 1.22724657   | -3.82747161  | -4.74955104   | -2.55942478  | -0.00673388 | -0.00681531 | -3.45594455  |
| 0.31250000 | 0.06250000 | 1.16285926  | 2.38474799   | -3.70907220  | -9.61095010   | -2.56925195  | -0.01304251 | -0.01312309 | -3.45624819  |
| 0.31250000 | 0.09375000 | 1.01836663  | 3.40239792   | -3.51468752  | -14.72148255  | -2.58691500  | -0.01827034 | -0.01835579 | -3.45798939  |
| 0.31250000 | 0.12500000 | 0.82126665  | 4.21723657   | -3.24649753  | -20.21921387  | -2.61495521  | -0.02227028 | -0.02224138 | -3.45866802  |
| 0.31250000 | 0.15625000 | 0.57744786  | 4.75363802   | -2.90870989  | -26.35848669  | -2.65749249  | -0.02462096 | -0.02455835 | -3.46124351  |
| 0.31250000 | 0.18750000 | 0.27828023  | 4.94355610   | -2.55449933  | -33.45402425  | -2.72092413  | -0.02491217 | -0.02508304 | -3.46363332  |
| 0.31250000 | 0.21875000 | -0.03626132 | 4.76297872   | -2.11955157  | -41.82030659  | -2.81381890  | -0.02326788 | -0.02379428 | -3.46786766  |
| 0.31250000 | 0.25000000 | -0.40636986 | 4.09224910   | -1.78171220  | -52.34619039  | -2.91578069  | -0.02207373 | -0.02178316 | -3.47419183  |
| 0.31250000 | 0.28125000 | -0.68961082 | 3.09447037   | -1.20698293  | -65.01991454  | -3.15662586  | -0.01786710 | -0.01632794 | -3.48036819  |
| 0.31250000 | 0.31250000 | -1.18683267 | 1.04717093   | -1.50429499  | -85.11723124  | -3.46783242  | -0.01418991 | -0.01381951 | -3.48763761  |
| 0.31250000 | 0.34375000 | -1.51007590 | -1.68014256  | -1.86137299  | -114.25907788 | -3.95625177  | -0.01055868 | -0.00978325 | -3.49923313  |
| 0.31250000 | 0.37500000 | -1.82596043 | -4.64289852  | -2.62746743  | -155.04710410 | -4.74811968  | -0.00583147 | -0.00751966 | -3.51148692  |
| 0.31250000 | 0.40625000 | -2.27304961 | -8.65027090  | -6.20321261  | -228.46947406 | -6.14594041  | -0.00808488 | -0.00096062 | -3.52704896  |
| 0.31250000 | 0.43750000 | -2.20569279 | -13.74277462 | -10.38997430 | -380.50675824 | -8.99575086  | -0.03103300 | 0.01019940  | -3.54547539  |
| 0.31250000 | 0.46875000 | -4.79526358 | -17.80750065 | -69.73728639 | -727.19841283 | -16.85005695 | 0.05728379  | -0.05457167 | -3.56782702  |
| 0.34375000 | 0.00000000 | 1.43444079  | 0.00000000   | -4.50834875  | 0.00000000    | -2.59734548  | -0.00000000 | -0.00001624 | -3.59374258  |
| 0.34375000 | 0.03125000 | 1.40433086  | 1.18959943   | -4.45833357  | -4.60726532   | -2.59904909  | -0.00867184 | -0.00870183 | -3.62687146  |
| 0.34375000 | 0.06250000 | 1.30581556  | 2.30864348   | -4.32572834  | -9.34034161   | -2.60900724  | -0.01680021 | -0.01678806 | -3.66454861  |

|            |            |             |              |              |               |              |             |             |              |
|------------|------------|-------------|--------------|--------------|---------------|--------------|-------------|-------------|--------------|
| 0.34375000 | 0.09375000 | 1.14853898  | 3.30078922   | -4.09611096  | -14.29975003  | -2.62642193  | -0.02350687 | -0.02368436 | -3.71129002  |
| 0.34375000 | 0.12500000 | 0.92846713  | 4.09466939   | -3.79320704  | -19.66157828  | -2.65427887  | -0.02867723 | -0.02880552 | -3.76334622  |
| 0.34375000 | 0.15625000 | 0.65201825  | 4.62569079   | -3.42221595  | -25.63840232  | -2.69656189  | -0.03197638 | -0.03197461 | -3.82952317  |
| 0.34375000 | 0.18750000 | 0.33921565  | 4.83364177   | -2.96206952  | -32.53426080  | -2.75835855  | -0.03258069 | -0.03263925 | -3.90795085  |
| 0.34375000 | 0.21875000 | -0.00109360 | 4.65652182   | -2.43309926  | -40.75442261  | -2.85063853  | -0.03112230 | -0.03084610 | -4.00149405  |
| 0.34375000 | 0.25000000 | -0.45104532 | 4.03832740   | -2.14772236  | -50.98486648  | -2.98540507  | -0.02747152 | -0.02820457 | -4.11982034  |
| 0.34375000 | 0.28125000 | -0.83741609 | 2.93539390   | -1.70723195  | -64.12681484  | -3.18642493  | -0.02412878 | -0.02369230 | -4.27388213  |
| 0.34375000 | 0.31250000 | -1.28098331 | 0.89295792   | -1.64854175  | -84.24991651  | -3.49311841  | -0.02015071 | -0.01689162 | -4.49645525  |
| 0.34375000 | 0.34375000 | -1.75462223 | -1.18277487  | -2.21033771  | -108.83220352 | -3.97251409  | -0.01470969 | -0.01428229 | -4.85071098  |
| 0.34375000 | 0.37500000 | -2.06094883 | -4.40385823  | -3.08039542  | -151.04665861 | -4.75840169  | -0.00891000 | -0.00869423 | -5.45565140  |
| 0.34375000 | 0.40625000 | -2.38990993 | -8.30423833  | -6.00619773  | -222.36436675 | -6.14822868  | -0.00480760 | -0.00232080 | -6.63144894  |
| 0.34375000 | 0.43750000 | -2.48405906 | -13.04486930 | -11.78509914 | -367.01075417 | -9.01309675  | -0.00391475 | 0.01301389  | -9.23578934  |
| 0.34375000 | 0.46875000 | -5.58880707 | -14.21641147 | -79.02887256 | -591.00539563 | -16.36576230 | -0.30470491 | -0.71517172 | -16.61910299 |
| 0.37500000 | 0.00000000 | 1.60475820  | 0.00000000   | -5.21639043  | 0.00000000    | -2.64303177  | 0.00000000  | -0.00001996 | -3.73116997  |
| 0.37500000 | 0.03125000 | 1.56908197  | 1.14606287   | -5.16609414  | -4.45061444   | -2.64501677  | -0.01106919 | -0.01109081 | -3.73025241  |
| 0.37500000 | 0.06250000 | 1.46015450  | 2.22621684   | -5.01789077  | -9.02531397   | -2.65453480  | -0.02137197 | -0.02142474 | -3.73120542  |
| 0.37500000 | 0.09375000 | 1.27993507  | 3.18309916   | -4.77594532  | -13.83473631  | -2.67250485  | -0.03014102 | -0.03029852 | -3.73201552  |
| 0.37500000 | 0.12500000 | 1.04147891  | 3.95729190   | -4.42196905  | -19.02803579  | -2.70041648  | -0.03663781 | -0.03667288 | -3.73230164  |
| 0.37500000 | 0.15625000 | 0.74529672  | 4.47623858   | -3.97797442  | -24.84973021  | -2.74200418  | -0.04105685 | -0.04080692 | -3.73547158  |
| 0.37500000 | 0.18750000 | 0.40582054  | 4.62769135   | -3.43878380  | -31.79084265  | -2.80354021  | -0.04262736 | -0.04237274 | -3.73698502  |
| 0.37500000 | 0.21875000 | -0.00239158 | 4.52750245   | -2.92871916  | -39.61114565  | -2.89271384  | -0.04060112 | -0.04036171 | -3.74115459  |
| 0.37500000 | 0.25000000 | -0.43940316 | 3.92712669   | -2.41355336  | -49.66180249  | -3.02533260  | -0.03738276 | -0.03647452 | -3.74568219  |
| 0.37500000 | 0.28125000 | -0.86377947 | 2.76037527   | -1.87855353  | -63.08901657  | -3.22297257  | -0.02982352 | -0.02984958 | -3.75066716  |
| 0.37500000 | 0.31250000 | -1.41863653 | 1.35092460   | -1.98982869  | -79.46530239  | -3.52599045  | -0.02577739 | -0.02284147 | -3.75700932  |
| 0.37500000 | 0.34375000 | -1.75361959 | -1.13719954  | -1.81711008  | -106.42219949 | -4.00049669  | -0.02085199 | -0.01748869 | -3.76448450  |
| 0.37500000 | 0.37500000 | -2.20503249 | -4.23985473  | -3.10701425  | -147.38573079 | -4.77505015  | -0.00815649 | -0.00974280 | -3.77600913  |
| 0.37500000 | 0.40625000 | -2.60130584 | -7.98970251  | -6.38447630  | -216.46901111 | -6.16036009  | -0.00930368 | -0.00506330 | -3.78887603  |
| 0.37500000 | 0.43750000 | -2.78654690 | -13.29827221 | -13.29827988 | -369.76887427 | -9.01855607  | -0.01494526 | 0.01494526  | -3.80494164  |
| 0.37500000 | 0.46875000 | -1.19443514 | -23.30561863 | -5.98421415  | -832.40578433 | -16.63140783 | -0.22641918 | 0.08690251  | -3.82405629  |
| 0.40625000 | 0.00000000 | 1.76687845  | 0.00000000   | -6.07029161  | 0.00000000    | -2.69576297  | 0.00000000  | 0.00001875  | -3.84894382  |
| 0.40625000 | 0.03125000 | 1.73386743  | 1.09374030   | -5.99839742  | -4.28596899   | -2.69730596  | -0.01371805 | -0.01381572 | -3.87817353  |
| 0.40625000 | 0.06250000 | 1.61717081  | 2.12943186   | -5.82435994  | -8.68508313   | -2.70740748  | -0.02695250 | -0.02683306 | -3.91311627  |
| 0.40625000 | 0.09375000 | 1.43207215  | 3.05205608   | -5.51921284  | -13.31072760  | -2.72559795  | -0.03810555 | -0.03806671 | -3.95484487  |
| 0.40625000 | 0.12500000 | 1.16773945  | 3.78820409   | -5.12939465  | -18.36603634  | -2.75401709  | -0.04635291 | -0.04671530 | -4.00658656  |
| 0.40625000 | 0.15625000 | 0.83135086  | 4.28903258   | -4.66276046  | -24.02868139  | -2.79553856  | -0.05169901 | -0.05159246 | -4.06960565  |
| 0.40625000 | 0.18750000 | 0.45869271  | 4.51579977   | -4.05694128  | -30.50806745  | -3.05590516  | -0.05354813 | -0.05362486 | -4.14698241  |
| 0.40625000 | 0.21875000 | 0.02790465  | 4.35125950   | -3.42828473  | -38.42714216  | -2.94437904  | -0.05217322 | -0.05228726 | -4.24147401  |
| 0.40625000 | 0.25000000 | -0.42122178 | 3.87883582   | -2.74205188  | -47.80160418  | -3.07451980  | -0.04735754 | -0.04713890 | -4.36304472  |
| 0.40625000 | 0.28125000 | -0.89138239 | 2.78933453   | -2.12373209  | -60.73952656  | -3.26775877  | -0.03922458 | -0.03991864 | -4.51854034  |
| 0.40625000 | 0.31250000 | -1.44095735 | 1.15215829   | -1.97351174  | -78.36990586  | -3.56183384  | -0.03134019 | -0.03157353 | -4.73523212  |
| 0.40625000 | 0.34375000 | -1.90715172 | -1.06682508  | -2.06264816  | -103.56061259 | -4.02807463  | -0.02399922 | -0.02278222 | -5.07158472  |
| 0.40625000 | 0.37500000 | -2.36914573 | -3.82079800  | -3.24349351  | -141.25254657 | -4.79820225  | -0.01743511 | -0.01219392 | -5.65554671  |
| 0.40625000 | 0.40625000 | -2.65660955 | -7.98199990  | -5.77738006  | -213.94092306 | -6.17360051  | -0.00285044 | -0.00698678 | -6.78928733  |
| 0.40625000 | 0.43750000 | -2.72788250 | -13.07725985 | -11.58270579 | -364.37836288 | -9.03594250  | -0.04236196 | -0.00658268 | -9.33331784  |
| 0.40625000 | 0.46875000 | -4.81165266 | -17.77235026 | -62.48599637 | -631.13174797 | -16.18712784 | 0.11993036  | -0.73675140 | -16.35865286 |
| 0.43750000 | 0.00000000 | 1.94748612  | 0.00000000   | -7.01810445  | 0.00000000    | -2.75659590  | 0.00000000  | -0.00000514 | -4.08933890  |
| 0.43750000 | 0.03125000 | 1.90614302  | 1.03732650   | -6.95310884  | -4.09742683   | -2.75810039  | -0.01723413 | -0.01741225 | -4.08854362  |
| 0.43750000 | 0.06250000 | 1.78476743  | 2.02781093   | -6.74324109  | -8.28705324   | -2.76854541  | -0.03329812 | -0.03337840 | -4.08770656  |
| 0.43750000 | 0.09375000 | 1.57097743  | 2.90760759   | -6.43646817  | -12.72371365  | -2.78743414  | -0.04720068 | -0.04723068 | -4.08734880  |
| 0.43750000 | 0.12500000 | 1.30484697  | 3.62079238   | -5.94107897  | -17.56134169  | -2.81568569  | -0.05812281 | -0.05802926 | -4.09013088  |
| 0.43750000 | 0.15625000 | 0.93923314  | 4.10127806   | -5.41560484  | -23.03701142  | -2.85802171  | -0.06552782 | -0.06506773 | -4.09080118  |
| 0.43750000 | 0.18750000 | 0.52652268  | 4.32828328   | -4.75536857  | -29.30575799  | -2.91774653  | -0.06774715 | -0.06764780 | -4.09423472  |
| 0.43750000 | 0.21875000 | 0.07046357  | 4.20783797   | -4.00548294  | -36.89958461  | -3.00346111  | -0.06687083 | -0.06632343 | -4.09563263  |
| 0.43750000 | 0.25000000 | -0.43871440 | 3.69366375   | -3.28317997  | -46.32612473  | -3.13259889  | -0.06022000 | -0.06062274 | -4.09706145  |
| 0.43750000 | 0.28125000 | -1.00383754 | 2.63325398   | -2.73946112  | -59.07282609  | -3.32189822  | -0.05199425 | -0.05137762 | -4.10335490  |
| 0.43750000 | 0.31250000 | -1.47991418 | 1.12379027   | -2.08899022  | -75.97632254  | -3.60878895  | -0.04251739 | -0.04365605 | -4.10717210  |
| 0.43750000 | 0.34375000 | -2.05590029 | -1.01412277  | -2.34559219  | -100.53644381 | -4.06535471  | -0.02722361 | -0.03243623 | -4.11655026  |
| 0.43750000 | 0.37500000 | -2.47370906 | -3.90806311  | -3.12520955  | -139.46756021 | -4.83067208  | -0.01680053 | -0.01656071 | -4.12182398  |
| 0.43750000 | 0.40625000 | -2.94456830 | -7.26994842  | -6.60653492  | -202.84624342 | -6.19390456  | -0.01415671 | -0.00788697 | -4.13416958  |
| 0.43750000 | 0.43750000 | -2.89048648 | -12.19523687 | -11.68653995 | -344.39698505 | -9.01669740  | -0.03229264 | -0.01731996 | -4.14385480  |

|            |            |             |              |              |               |              |             |             |              |
|------------|------------|-------------|--------------|--------------|---------------|--------------|-------------|-------------|--------------|
| 0.43750000 | 0.46875000 | -6.31696018 | -12.59989271 | -87.36440956 | -545.68636331 | -16.52099924 | 0.04131335  | 0.56315253  | -4.16174707  |
| 0.46875000 | 0.00000000 | 2.13871517  | 0.00000000   | -8.10055412  | 0.00000000    | -2.82717150  | -0.00000000 | -0.00001927 | -4.18325267  |
| 0.46875000 | 0.03125000 | 2.08176498  | 0.97357251   | -8.06267535  | -3.89248184   | -2.82895515  | -0.02115840 | -0.02116068 | -4.20623119  |
| 0.46875000 | 0.06250000 | 1.94389933  | 1.89913456   | -7.84883848  | -7.89643791   | -2.83961524  | -0.04095589 | -0.04095965 | -4.23872443  |
| 0.46875000 | 0.09375000 | 1.71829606  | 2.72666211   | -7.49198226  | -12.13736842  | -2.85917911  | -0.05799408 | -0.05829299 | -4.27744373  |
| 0.46875000 | 0.12500000 | 1.41894026  | 3.40198892   | -6.97328609  | -16.77162582  | -2.88894182  | -0.07204345 | -0.07199725 | -4.32340794  |
| 0.46875000 | 0.15625000 | 1.03770713  | 3.87803282   | -6.34744666  | -21.98422231  | -2.93115647  | -0.08098192 | -0.08103016 | -4.38505800  |
| 0.46875000 | 0.18750000 | 0.60192947  | 4.09785816   | -5.57743638  | -28.04932978  | -2.99099770  | -0.08457039 | -0.08472693 | -4.45733990  |
| 0.46875000 | 0.21875000 | 0.11460986  | 3.99211917   | -4.71498300  | -35.40088185  | -3.07647234  | -0.08300326 | -0.08305058 | -4.55656387  |
| 0.46875000 | 0.25000000 | -0.44711839 | 3.48631251   | -3.92534809  | -44.68588909  | -3.20195311  | -0.07751120 | -0.07661580 | -4.67522501  |
| 0.46875000 | 0.28125000 | -0.97399016 | 2.62415875   | -2.99682937  | -56.35854897  | -3.38710272  | -0.06607216 | -0.06638638 | -4.83772762  |
| 0.46875000 | 0.31250000 | -1.56203373 | 1.22955718   | -2.45784744  | -72.44832920  | -3.66819363  | -0.05344190 | -0.05149316 | -5.05247396  |
| 0.46875000 | 0.34375000 | -2.06546138 | -0.91941875  | -2.13793052  | -96.91400989  | -4.11510213  | -0.03980093 | -0.03756512 | -5.38297871  |
| 0.46875000 | 0.37500000 | -2.69818393 | -3.70306383  | -3.62392253  | -134.65498778 | -4.86830158  | -0.02269514 | -0.01981667 | -5.92668179  |
| 0.46875000 | 0.40625000 | -3.08262659 | -6.89913213  | -6.50967483  | -195.47408224 | -6.21801966  | -0.02163185 | -0.01230092 | -6.99926508  |
| 0.46875000 | 0.43750000 | -3.34102141 | -11.44981633 | -14.45705555 | -327.95811046 | -9.03662138  | -0.00551451 | -0.00261665 | -9.49168735  |
| 0.46875000 | 0.46875000 | -1.40491637 | -17.13015528 | -4.967344327 | -695.96515012 | -16.83113750 | 0.03799262  | -0.05292362 | -16.41187156 |
| 0.50000000 | 0.00000000 | 2.28286284  | 0.00000000   | -9.50758537  | 0.00000000    | -2.90941278  | 0.00000000  | 0.00003935  | -4.55366552  |
| 0.50000000 | 0.03125000 | 2.25073227  | 0.90289113   | -9.38193625  | -3.66976324   | -2.91104429  | -0.02545319 | -0.02548445 | -4.55159419  |
| 0.50000000 | 0.06250000 | 2.09959888  | 1.76071146   | -9.15377703  | -7.45681134   | -2.92256323  | -0.04942850 | -0.04961742 | -4.55050427  |
| 0.50000000 | 0.09375000 | 1.86340976  | 2.52930790   | -8.73989357  | -11.48378507  | -2.94358108  | -0.07074980 | -0.07088332 | -4.55158494  |
| 0.50000000 | 0.12500000 | 1.54111550  | 3.17110610   | -8.16754793  | -15.86601914  | -2.97446254  | -0.08788955 | -0.08788998 | -4.55536841  |
| 0.50000000 | 0.15625000 | 1.14303183  | 3.62577522   | -7.43874366  | -20.83993894  | -3.01747915  | -0.09930585 | -0.09946578 | -4.55585726  |
| 0.50000000 | 0.18750000 | 0.67782205  | 3.83498779   | -6.57155586  | -26.67600380  | -3.07827915  | -0.10505388 | -0.10499648 | -4.55884589  |
| 0.50000000 | 0.21875000 | 0.16557010  | 3.76036922   | -5.56946018  | -33.70182410  | -3.16303725  | -0.10419369 | -0.10417657 | -4.55766080  |
| 0.50000000 | 0.25000000 | -0.37528090 | 3.40955860   | -4.46341080  | -42.14474349  | -3.28398225  | -0.09667712 | -0.09596511 | -4.56192521  |
| 0.50000000 | 0.28125000 | -0.97339578 | 2.51600598   | -3.49013084  | -53.83929425  | -3.46535527  | -0.08367464 | -0.08281790 | -4.56589022  |
| 0.50000000 | 0.31250000 | -1.60492298 | 1.25206350   | -2.80675193  | -69.08600621  | -3.74015322  | -0.06808278 | -0.06586017 | -4.56860157  |
| 0.50000000 | 0.34375000 | -2.22327535 | -0.91311472  | -2.65046334  | -93.57122691  | -4.18197622  | -0.05204211 | -0.04945317 | -4.57101002  |
| 0.50000000 | 0.37500000 | -2.84326863 | -3.38604502  | -3.79347069  | -128.43416888 | -4.91101056  | -0.03454130 | -0.02791843 | -4.57687855  |
| 0.50000000 | 0.40625000 | -3.19043216 | -6.72780992  | -6.26297912  | -190.20851463 | -6.25437318  | -0.02094198 | -0.01654426 | -4.58856974  |
| 0.50000000 | 0.43750000 | -3.39721400 | -11.14181048 | -13.69088696 | -320.57649708 | -9.07382642  | -0.01589446 | -0.00603613 | -4.60008306  |
| 0.50000000 | 0.46875000 | -6.94033190 | -17.34863517 | -95.56087329 | -658.17158028 | -16.71158028 | 0.16232819  | 0.63529933  | -4.61252625  |
| 0.53125000 | 0.00000000 | 2.46604243  | 0.00000000   | -11.01946925 | 0.00000000    | -3.00631441  | 0.00000000  | 0.00000951  | -4.62806526  |
| 0.53125000 | 0.03125000 | 2.41444347  | 0.82624256   | -10.93435871 | -3.42502366   | -3.00768934  | -0.03044511 | -0.03041586 | -4.64798547  |
| 0.53125000 | 0.06250000 | 2.25980360  | 1.60924360   | -10.66261242 | -6.97791109   | -3.02032292  | -0.05894553 | -0.05894553 | -4.67464672  |
| 0.53125000 | 0.09375000 | 2.00911898  | 2.31913009   | -10.20327148 | -10.74894646  | -3.04232151  | -0.08479790 | -0.08484317 | -4.69990471  |
| 0.53125000 | 0.12500000 | 1.66700416  | 2.90499930   | -9.56656382  | -14.91449790  | -3.07468828  | -0.10573052 | -0.10604941 | -4.74695840  |
| 0.53125000 | 0.15625000 | 1.23576469  | 3.33990674   | -8.78067440  | -19.59966940  | -3.11957753  | -0.12092492 | -0.12081705 | -4.80013964  |
| 0.53125000 | 0.18750000 | 0.76437801  | 3.59715913   | -7.73984950  | -24.95730343  | -3.18138269  | -0.12855018 | -0.12832594 | -4.87166175  |
| 0.53125000 | 0.21875000 | 0.19557670  | 3.44686224   | -6.69336662  | -32.06843716  | -3.26546280  | -0.12835220 | -0.12813639 | -4.96266800  |
| 0.53125000 | 0.25000000 | -0.33966093 | 3.07230060   | -5.30736682  | -40.48513263  | -3.38621221  | -0.12144421 | -0.12148786 | -5.08352405  |
| 0.53125000 | 0.28125000 | -0.97822300 | 2.38737417   | -4.17780558  | -51.07604135  | -3.55910005  | -0.10527967 | -0.10481629 | -5.24424753  |
| 0.53125000 | 0.31250000 | -1.66435317 | 1.02810892   | -3.36484710  | -66.85163781  | -3.81989801  | -0.08771389 | -0.08351585 | -5.45614775  |
| 0.53125000 | 0.34375000 | -2.27086599 | -0.39532572  | -2.80460364  | -86.12953456  | -4.24826100  | -0.06525095 | -0.06266649 | -5.77617120  |
| 0.53125000 | 0.37500000 | -2.85969111 | -3.06435923  | -3.44887105  | -121.88269510 | -4.97480346  | -0.04055187 | -0.04173548 | -6.30166577  |
| 0.53125000 | 0.40625000 | -3.36167016 | -6.33788087  | -6.44991991  | -181.89450182 | -6.29587239  | -0.02086023 | -0.02008435 | -7.30910866  |
| 0.53125000 | 0.43750000 | -3.79904362 | -10.47500183 | -15.88322954 | -304.23138857 | -9.06799800  | -0.00364296 | 0.00182937  | -9.64172186  |
| 0.53125000 | 0.46875000 | -6.67487550 | -12.29383782 | -91.91956063 | -536.20372030 | -17.10332706 | 0.04674547  | 0.31145651  | -17.13538436 |
| 0.56250000 | 0.00000000 | 2.65057641  | 0.00000000   | -12.77103446 | 0.00000000    | -3.1226105   | 0.00000000  | 0.00001732  | -5.16806820  |
| 0.56250000 | 0.03125000 | 2.55816078  | 0.74228423   | -12.79656496 | -3.16101789   | -3.12262072  | -0.03515693 | -0.03542748 | -5.16861790  |
| 0.56250000 | 0.06250000 | 2.40773264  | 1.44346872   | -12.45948809 | -6.45911293   | -3.13541949  | -0.06888528 | -0.06907785 | -5.16454589  |
| 0.56250000 | 0.09375000 | 2.14857017  | 2.07409758   | -11.93576980 | -11.005156365 | -3.15912100  | -0.09958790 | -0.09978742 | -5.16415356  |
| 0.56250000 | 0.12500000 | 1.78554898  | 2.61953593   | -11.23857701 | -13.85341890  | -3.19365296  | -0.12524519 | -0.12554870 | -5.16777162  |
| 0.56250000 | 0.15625000 | 1.34259529  | 3.01411897   | -10.32935248 | -18.29005937  | -3.24045944  | -0.14404931 | -0.14452624 | -5.16686247  |
| 0.56250000 | 0.18750000 | 0.82406741  | 3.21004617   | -9.24318562  | -23.55352274  | -3.30345632  | -0.15498211 | -0.15511322 | -5.17176714  |
| 0.56250000 | 0.21875000 | 0.27721151  | 3.19240174   | -7.89107972  | -29.86370761  | -3.38888796  | -0.15708606 | -0.15752780 | -5.16967444  |
| 0.56250000 | 0.25000000 | -0.34417668 | 2.87626722   | -6.52405420  | -37.81574830  | -3.50612672  | -0.15080321 | -0.14967101 | -5.17007194  |
| 0.56250000 | 0.28125000 | -0.98133090 | 2.18029064   | -5.08412183  | -48.34301884  | -3.67451080  | -0.13323077 | -0.13175429 | -5.17563628  |
| 0.56250000 | 0.31250000 | -1.68637596 | 1.06769296   | -4.01110566  | -62.59715058  | -3.93425237  | -0.11116474 | -0.10789315 | -5.17677116  |

|            |            |             |              |              |               |              |             |             |              |
|------------|------------|-------------|--------------|--------------|---------------|--------------|-------------|-------------|--------------|
| 0.56250000 | 0.34375000 | -2.23410635 | -0.75211740  | -2.80620749  | -84.60153015  | -4.35050988  | -0.08086428 | -0.08110119 | -5.17939489  |
| 0.56250000 | 0.37500000 | -2.90705643 | -2.72062061  | -3.37027863  | -114.58350082 | -5.04841228  | -0.05471023 | -0.05380991 | -5.18272555  |
| 0.56250000 | 0.40625000 | -3.42839032 | -5.88493544  | -6.03148732  | -172.33771349 | -6.34049886  | -0.03436797 | -0.02380516 | -5.18957794  |
| 0.56250000 | 0.43750000 | -3.87231577 | -10.46582879 | -15.32002218 | -301.28679573 | -9.12462811  | 0.00760768  | -0.00198763 | -5.20090053  |
| 0.56250000 | 0.46875000 | -5.82729288 | -15.97945021 | -74.08288561 | -634.65897752 | -16.85275344 | -0.00703811 | 0.56805038  | -5.21010336  |
| 0.59375000 | 0.00000000 | 2.73520301  | 0.00000000   | -15.11936057 | 0.00000000    | -3.25953855  | 0.00000000  | -0.00007969 | -5.22125670  |
| 0.59375000 | 0.03125000 | 2.68371959  | 0.64414095   | -15.00190622 | -2.90134137   | -3.26043006  | -0.04023393 | -0.04015844 | -5.23524282  |
| 0.59375000 | 0.06250000 | 2.52431419  | 1.25955439   | -14.63963460 | -5.91634760   | -3.27450276  | -0.07913888 | -0.07907877 | -5.25194178  |
| 0.59375000 | 0.09375000 | 2.23764311  | 1.82304410   | -14.11721367 | -9.14354439   | -3.30026361  | -0.11442049 | -0.11451875 | -5.27813614  |
| 0.59375000 | 0.12500000 | 1.89208301  | 2.30380176   | -13.24219528 | -12.72487381  | -3.33543927  | -0.14519908 | -0.14534526 | -5.31384463  |
| 0.59375000 | 0.15625000 | 1.42221518  | 2.65537487   | -12.26257065 | -16.86864622  | -3.38463000  | -0.16886563 | -0.16949707 | -5.35757792  |
| 0.59375000 | 0.18750000 | 0.90691160  | 2.86223179   | -10.96755049 | -21.72014623  | -3.44942990  | -0.18412956 | -0.18460033 | -5.41414043  |
| 0.59375000 | 0.21875000 | 0.36592733  | 2.84899543   | -9.35076507  | -27.70869029  | -3.53698590  | -0.18934732 | -0.18994797 | -5.50137560  |
| 0.59375000 | 0.25000000 | -0.29122912 | 2.54179482   | -7.83061256  | -35.43747792  | -3.65241415  | -0.18388327 | -0.18351116 | -5.61747127  |
| 0.59375000 | 0.28125000 | -0.95872489 | 2.03384988   | -6.17754881  | -44.86355781  | -3.81864597  | -0.16673796 | -0.16637612 | -5.77803961  |
| 0.59375000 | 0.31250000 | -1.63427278 | 1.08409891   | -4.61028818  | -58.03773582  | -4.06799803  | -0.13985113 | -0.13758396 | -5.99483621  |
| 0.59375000 | 0.34375000 | -2.67659740 | -0.91619609  | -5.15709734  | -81.20488562  | -4.47255002  | -0.10413980 | -0.10607203 | -6.31511708  |
| 0.59375000 | 0.37500000 | -2.95782185 | -2.59207296  | -3.50162974  | -108.79189064 | -5.14482567  | -0.07043155 | -0.06896501 | -6.81106129  |
| 0.59375000 | 0.40625000 | -3.55877802 | -5.57066753  | -6.15692727  | -163.93195352 | -6.40430441  | -0.03240271 | -0.0346207  | -7.73515070  |
| 0.59375000 | 0.43750000 | -3.73235307 | -9.33432935  | -12.67397240 | -276.20517684 | -9.14343594  | -0.04296703 | 0.00401093  | -9.93008830  |
| 0.59375000 | 0.46875000 | -3.57714496 | -17.56389650 | -34.43933588 | -660.64141970 | -16.90929644 | 0.40856912  | 0.49657975  | -16.92883769 |
| 0.62500000 | 0.00000000 | 2.84198529  | 0.00000000   | -17.72227185 | 0.00000000    | -3.42817412  | 0.00000000  | -0.00000641 | -5.99712388  |
| 0.62500000 | 0.03125000 | 2.76204889  | 0.54340138   | -17.68799469 | -2.60911452   | -3.42867854  | -0.04464108 | -0.04469017 | -5.99512423  |
| 0.62500000 | 0.06250000 | 2.59318210  | 1.06502262   | -17.30939880 | -5.32473121   | -3.44357995  | -0.08823687 | -0.08812709 | -5.99992842  |
| 0.62500000 | 0.09375000 | 2.32639804  | 1.54299771   | -16.64047167 | -8.25685300   | -3.47035979  | -0.12866837 | -0.12864945 | -5.99712429  |
| 0.62500000 | 0.12500000 | 1.96064855  | 1.97018183   | -15.71694298 | -11.47721947  | -3.50669429  | -0.16525400 | -0.16513178 | -5.99980621  |
| 0.62500000 | 0.15625000 | 1.50926480  | 2.26746979   | -14.52169450 | -15.33162815  | -3.55701997  | -0.19442645 | -0.19430945 | -6.00123992  |
| 0.62500000 | 0.18750000 | 1.00862033  | 2.46108535   | -12.97284683 | -19.80498061  | -3.62604784  | -0.21578233 | -0.21608483 | -5.99674130  |
| 0.62500000 | 0.21875000 | 0.37096764  | 2.46643787   | -11.46619585 | -25.37919739  | -3.71394087  | -0.22580187 | -0.22546589 | -6.00320015  |
| 0.62500000 | 0.25000000 | -0.25354671 | 2.28463204   | -9.54599480  | -32.25713951  | -3.83167297  | -0.22334633 | -0.22283272 | -6.00146989  |
| 0.62500000 | 0.28125000 | -0.92475107 | 1.77192647   | -7.57065974  | -41.53520136  | -3.99276656  | -0.20549975 | -0.20626452 | -6.00340891  |
| 0.62500000 | 0.31250000 | -1.60410815 | 0.93136101   | -5.61940180  | -54.00337255  | -4.23373287  | -0.17702629 | -0.17589213 | -6.00405335  |
| 0.62500000 | 0.34375000 | -2.29699119 | -0.34057961  | -4.11182382  | -71.8919549   | -4.61391549  | -0.13457623 | -0.13312660 | -6.00828199  |
| 0.62500000 | 0.37500000 | -2.95226069 | -2.29574969  | -3.58849910  | -100.92006320 | -5.26543224  | -0.09235950 | -0.09152028 | -6.01240857  |
| 0.62500000 | 0.40625000 | -3.55751420 | -4.82890422  | -5.67752409  | -149.98530894 | -6.50312153  | -0.05413732 | -0.05126185 | -6.01632756  |
| 0.62500000 | 0.43750000 | -4.07214263 | -8.60712524  | -14.57695638 | -257.87791483 | -9.19132416  | -0.02606695 | -0.02664845 | -6.01327699  |
| 0.62500000 | 0.46875000 | -1.99671801 | -12.36670290 | -5.51636533  | -501.20473422 | -16.78267650 | -0.03833052 | -0.48948067 | -6.02654495  |
| 0.65625000 | 0.00000000 | 2.85778887  | 0.00000000   | -21.00922339 | 0.00000000    | -3.63689902  | 0.00000000  | -0.00000757 | -6.03729384  |
| 0.65625000 | 0.03125000 | 2.76385095  | 0.44230221   | -21.01688393 | -2.27761473   | -3.63791691  | -0.04835591 | -0.04843992 | -6.03970686  |
| 0.65625000 | 0.06250000 | 2.60691317  | 0.86368303   | -20.55527017 | -4.67327303   | -3.65340252  | -0.09579772 | -0.09534205 | -6.06182132  |
| 0.65625000 | 0.09375000 | 2.34791320  | 1.24849453   | -19.79158882 | -7.29332283   | -3.67937454  | -0.14063111 | -0.14069746 | -6.07943291  |
| 0.65625000 | 0.12500000 | 1.99647314  | 1.57851527   | -18.70946266 | -10.26242549  | -3.71813972  | -0.18171695 | -0.18247817 | -6.10897355  |
| 0.65625000 | 0.15625000 | 1.55110045  | 1.85131346   | -17.35452497 | -13.65994346  | -3.76777423  | -0.21828887 | -0.21885508 | -6.13810344  |
| 0.65625000 | 0.18750000 | 1.04054809  | 1.99389341   | -15.65230213 | -17.86243603  | -3.84021614  | -0.24643130 | -0.24630472 | -6.18177364  |
| 0.65625000 | 0.21875000 | 0.42827839  | 2.07330096   | -13.82625783 | -22.72463237  | -3.93100400  | -0.26256899 | -0.26312173 | -6.25712841  |
| 0.65625000 | 0.25000000 | -0.14705051 | 1.99011021   | -11.41956394 | -28.83409928  | -4.04809056  | -0.26569810 | -0.26644447 | -6.35576979  |
| 0.65625000 | 0.28125000 | -0.83895938 | 1.56131434   | -9.17789041  | -37.44687814  | -4.20747482  | -0.25370478 | -0.25134111 | -6.50107269  |
| 0.65625000 | 0.31250000 | -1.54262110 | 0.86765304   | -6.90518896  | -48.88788389  | -4.43973993  | -0.22350676 | -0.22064354 | -6.71873176  |
| 0.65625000 | 0.34375000 | -2.21234165 | -0.30303653  | -4.77410768  | -65.91515160  | -4.80359298  | -0.17131657 | -0.17165744 | -7.03429950  |
| 0.65625000 | 0.37500000 | -2.91707135 | -1.99736009  | -3.85485904  | -92.41174581  | -5.42114581  | -0.12377764 | -0.11999556 | -7.51394931  |
| 0.65625000 | 0.40625000 | -3.52234280 | -4.46872431  | -5.12977775  | -139.76273860 | -6.59986370  | -0.06187029 | -0.06394761 | -8.36660244  |
| 0.65625000 | 0.43750000 | -4.03887878 | -8.07980537  | -13.24592341 | -243.33477738 | -9.26265687  | -0.03012815 | -0.03207263 | -10.40314320 |
| 0.65625000 | 0.46875000 | -4.10134483 | -9.27302551  | -39.48152341 | -405.24534480 | -16.92376063 | 0.04859212  | -0.39687519 | -16.79774144 |
| 0.68750000 | 0.00000000 | 2.63150000  | 0.00000000   | -25.66075808 | 0.00000000    | -3.90011274  | 0.00000000  | -0.00006056 | -7.20608703  |
| 0.68750000 | 0.03125000 | 2.67855067  | 0.32718949   | -25.12461696 | -1.95565370   | -3.89921179  | -0.05066986 | -0.05071854 | -7.19523258  |
| 0.68750000 | 0.06250000 | 2.53955939  | 0.63752293   | -24.56097427 | -4.03036882   | -3.91540947  | -0.10013383 | -0.10027262 | -7.20359652  |
| 0.68750000 | 0.09375000 | 2.29961296  | 0.94548031   | -23.66848141 | -6.23735504   | -3.94168612  | -0.14917667 | -0.14858935 | -7.19277296  |
| 0.68750000 | 0.12500000 | 1.96301700  | 1.18458443   | -22.44677221 | -8.88727579   | -3.97967662  | -0.19526960 | -0.19560766 | -7.18308144  |
| 0.68750000 | 0.15625000 | 1.50242506  | 1.39096414   | -21.03406589 | -11.93165284  | -4.03165284  | -0.23795673 | -0.23794293 | -7.18030357  |
| 0.68750000 | 0.18750000 | 0.98965089  | 1.49811713   | -19.18446515 | -15.74974236  | -4.10250546  | -0.27327037 | -0.27339042 | -7.18395913  |

|            |            |             |              |              |               |              |             |             |              |
|------------|------------|-------------|--------------|--------------|---------------|--------------|-------------|-------------|--------------|
| 0.68750000 | 0.21875000 | 0.50837991  | 1.62049642   | -16.60917659 | -19.97429180  | -4.19519573  | -0.30034618 | -0.29895291 | -7.19943006  |
| 0.68750000 | 0.25000000 | -0.13840658 | 1.53004953   | -14.21655320 | -25.75605121  | -4.31272589  | -0.31055598 | -0.31016609 | -7.19051777  |
| 0.68750000 | 0.28125000 | -0.83110096 | 1.14969829   | -11.64668668 | -33.91676546  | -4.47076393  | -0.30446752 | -0.30242418 | -7.18736464  |
| 0.68750000 | 0.31250000 | -1.44730243 | 0.71821414   | -8.54409559  | -43.69778675  | -4.69294760  | -0.27603804 | -0.27262582 | -7.19935010  |
| 0.68750000 | 0.34375000 | -2.14346786 | -0.24705339  | -5.98581951  | -59.14378573  | -5.03848300  | -0.23274740 | -0.22063389 | -7.19168321  |
| 0.68750000 | 0.37500000 | -2.88169947 | -1.87185544  | -4.59622815  | -84.82474042  | -5.63151169  | -0.15953081 | -0.15938358 | -7.19182163  |
| 0.68750000 | 0.40625000 | -3.48855987 | -4.07211437  | -5.08464854  | -128.70142360 | -6.77075069  | -0.08836425 | -0.09227264 | -7.18601587  |
| 0.68750000 | 0.43750000 | -4.05614454 | -6.68104472  | -6.68104472  | -211.38860552 | -9.31323572  | -0.07111998 | -0.03001927 | -7.18136495  |
| 0.68750000 | 0.46875000 | -4.69732769 | -10.84329369 | -46.05498003 | -423.62753467 | -16.57537734 | -0.24866704 | 0.34698809  | -7.20076842  |
| 0.71875000 | 0.00000000 | 2.44519342  | 0.00000000   | -30.75269848 | 0.00000000    | -4.23710967  | 0.00000000  | 0.00004399  | -7.21611389  |
| 0.71875000 | 0.03125000 | 2.42207367  | 0.20153993   | -30.48454471 | -1.63736801   | -4.23227705  | -0.05032752 | -0.05070757 | -7.19958931  |
| 0.71875000 | 0.06250000 | 2.28393142  | 0.41115796   | -29.90075057 | -3.32012943   | -4.24754369  | -0.10145350 | -0.10009083 | -7.23984415  |
| 0.71875000 | 0.09375000 | 2.09067494  | 0.64273048   | -28.77712394 | -5.07032790   | -4.27386398  | -0.15154363 | -0.15097723 | -7.25863378  |
| 0.71875000 | 0.12500000 | 1.81533699  | 0.78027428   | -27.24315034 | -7.39842706   | -4.31026567  | -0.20198714 | -0.20150352 | -7.25686473  |
| 0.71875000 | 0.15625000 | 1.48283175  | 0.93604091   | -25.20773284 | -9.98461081   | -4.35865252  | -0.24949515 | -0.25013858 | -7.27606792  |
| 0.71875000 | 0.18750000 | 1.03331901  | 0.99321055   | -22.94966678 | -13.40482878  | -4.43202505  | -0.29402292 | -0.29324449 | -7.29021746  |
| 0.71875000 | 0.21875000 | 0.51690597  | 1.08024993   | -20.32088260 | -17.25181568  | -4.52250475  | -0.33101445 | -0.33298244 | -7.36298244  |
| 0.71875000 | 0.25000000 | -0.13395307 | 1.01530659   | -17.70882075 | -22.50981042  | -4.64622022  | -0.35755011 | -0.35645731 | -7.41793938  |
| 0.71875000 | 0.28125000 | -0.78929228 | 0.79713368   | -14.65190190 | -29.51770637  | -4.80508489  | -0.36152019 | -0.36042941 | -7.55084022  |
| 0.71875000 | 0.31250000 | -1.40900043 | 0.33234619   | -11.12743044 | -39.33168775  | -5.02347659  | -0.33951206 | -0.33888465 | -7.74069838  |
| 0.71875000 | 0.34375000 | -2.10694921 | -0.35321615  | -8.04645771  | -52.85156768  | -5.35541926  | -0.29172666 | -0.29037559 | -8.05740957  |
| 0.71875000 | 0.37500000 | -2.77367009 | -1.61400454  | -5.53423473  | -75.23785368  | -5.90803159  | -0.21499103 | -0.21730574 | -8.53606676  |
| 0.71875000 | 0.40625000 | -3.48072279 | -3.43154424  | -5.74883244  | -113.79530408 | -6.99674776  | -0.13668131 | -0.12819843 | -9.33089074  |
| 0.71875000 | 0.43750000 | -4.04101532 | -6.34486927  | -12.11607370 | -199.72940966 | -9.49664271  | -0.07005340 | -0.05186690 | -11.16262818 |
| 0.71875000 | 0.46875000 | -4.68144138 | -10.45713387 | -43.67828554 | -421.29853461 | -16.49814164 | 0.02880082  | 0.36124302  | -17.45333968 |
| 0.75000000 | 0.00000000 | 2.08322794  | 0.00000000   | -37.31960073 | 0.00000000    | -4.67723663  | 0.00000000  | 0.00007456  | -8.98078900  |
| 0.75000000 | 0.03125000 | 2.08786649  | 0.07096373   | -36.91442415 | -1.31365285   | -4.67002786  | -0.04840223 | -0.04778633 | -8.97279225  |
| 0.75000000 | 0.06250000 | 1.94900343  | 0.19009536   | -36.34459820 | -2.53662775   | -4.68112405  | -0.09728126 | -0.09616336 | -8.98369525  |
| 0.75000000 | 0.09375000 | 1.84731549  | 0.25993867   | -34.77537783 | -4.11478520   | -4.70674791  | -0.14630626 | -0.14674250 | -8.97262543  |
| 0.75000000 | 0.12500000 | 1.49135741  | 0.36752501   | -33.59757890 | -5.81542204   | -4.74018823  | -0.19799219 | -0.19799683 | -8.97710164  |
| 0.75000000 | 0.15625000 | 1.23921738  | 0.44250455   | -31.12122637 | -8.01082003   | -4.78756493  | -0.25055312 | -0.25021591 | -8.96541274  |
| 0.75000000 | 0.18750000 | 0.90335171  | 0.47438375   | -28.24317804 | -10.87703145  | -4.85622811  | -0.30462071 | -0.30334365 | -8.96514256  |
| 0.75000000 | 0.21875000 | 0.40466036  | 0.44361203   | -25.40018322 | -14.67004072  | -4.93985805  | -0.35397832 | -0.35396187 | -8.97873451  |
| 0.75000000 | 0.25000000 | -0.11917196 | 0.40255080   | -21.98018279 | -19.34276710  | -5.06424390  | -0.39455883 | -0.39433014 | -8.97054979  |
| 0.75000000 | 0.28125000 | -0.76447533 | 0.29462218   | -18.58920863 | -25.41204482  | -5.22297405  | -0.41793935 | -0.41705716 | -8.97709017  |
| 0.75000000 | 0.31250000 | -1.35174218 | 0.01934640   | -14.47545359 | -33.86038378  | -5.44118446  | -0.41318603 | -0.40879573 | -8.98399435  |
| 0.75000000 | 0.34375000 | -1.97787616 | -0.49016960  | -10.44418783 | -45.99440221  | -5.76009889  | -0.37154297 | -0.37244525 | -8.98329674  |
| 0.75000000 | 0.37500000 | -2.61670449 | -1.33647706  | -7.00055145  | -64.60283250  | -6.28830962  | -0.29672973 | -0.29170947 | -8.96204966  |
| 0.75000000 | 0.40625000 | -3.25025454 | -2.93849683  | -5.54555411  | -99.70004355  | -7.29848303  | -0.18721136 | -0.18332426 | -8.95937390  |
| 0.75000000 | 0.43750000 | -3.79838103 | -5.35542054  | -9.96524206  | -173.69333727 | -9.68759338  | -0.09829630 | -0.07628569 | -8.98384270  |
| 0.75000000 | 0.46875000 | -4.03049872 | -8.95092410  | -28.12466651 | -330.37776644 | -15.68417717 | 0.15250062  | 0.15537215  | -8.98805675  |
| 0.78125000 | 0.00000000 | 1.19691602  | 0.00000000   | -47.57116811 | 0.00000000    | -5.26576928  | 0.00000000  | 0.00001420  | -8.97985427  |
| 0.78125000 | 0.03125000 | 1.45045888  | 0.00399395   | -45.83492036 | -0.74163818   | -5.25548957  | -0.04293928 | -0.04298099 | -9.00465341  |
| 0.78125000 | 0.06250000 | 1.40813253  | -0.01329767  | -44.79468136 | -1.65703004   | -5.26421905  | -0.08552328 | -0.08642737 | -8.99491383  |
| 0.78125000 | 0.09375000 | 1.28611953  | -0.05447765  | -43.31785786 | -2.85768262   | -5.28604283  | -0.13247914 | -0.13345788 | -9.00683867  |
| 0.78125000 | 0.12500000 | 1.13386238  | -0.07318329  | -41.15532809 | -4.26894148   | -5.30884922  | -0.18159885 | -0.18279052 | -9.01118115  |
| 0.78125000 | 0.15625000 | 0.91741964  | -0.04394373  | -38.46177154 | -5.88962209   | -5.35066666  | -0.23788121 | -0.23788121 | -9.01757841  |
| 0.78125000 | 0.18750000 | 0.57291564  | -0.12141360  | -35.59087124 | -8.51713824   | -5.41049745  | -0.29543119 | -0.29525653 | -9.04741636  |
| 0.78125000 | 0.21875000 | 0.27578366  | -0.16321135  | -31.61042885 | -11.71023539  | -5.49121828  | -0.35639533 | -0.35694518 | -9.07399337  |
| 0.78125000 | 0.25000000 | -0.19654569 | -0.15255782  | -27.77357862 | -15.53495298  | -5.60965634  | -0.41478887 | -0.41656851 | -9.12013239  |
| 0.78125000 | 0.28125000 | -0.67724359 | -0.21459909  | -23.24779665 | -20.85859580  | -5.76539763  | -0.46354244 | -0.46507884 | -9.17500283  |
| 0.78125000 | 0.31250000 | -1.28154776 | -0.36337190  | -18.85667238 | -28.17525829  | -5.98715564  | -0.48719067 | -0.48680399 | -9.33645901  |
| 0.78125000 | 0.34375000 | -1.85835416 | -0.66599256  | -13.99196965 | -38.64850216  | -6.30158168  | -0.46737556 | -0.46834000 | -9.59964693  |
| 0.78125000 | 0.37500000 | -2.38437443 | -1.27000523  | -8.96921286  | -54.89336330  | -6.78473158  | -0.38969062 | -0.39086971 | -10.05579473 |
| 0.78125000 | 0.40625000 | -2.99421855 | -2.39222941  | -6.11565002  | -83.91524981  | -7.73346535  | -0.26345202 | -0.26803328 | -10.85315102 |
| 0.78125000 | 0.43750000 | -3.51830528 | -4.19196924  | -8.13657710  | -143.61636556 | -9.94988949  | -0.11466487 | -0.11666487 | -12.49665733 |
| 0.78125000 | 0.46875000 | -4.25834937 | -5.92881664  | -33.43520340 | -239.06546090 | -16.36936838 | -0.03898525 | 0.57604710  | -17.35800056 |
| 0.81250000 | 0.00000000 | 0.18008874  | 0.00000000   | -60.55482144 | 0.00000000    | -6.07974684  | 0.00000000  | -0.00094899 | -11.96152050 |
| 0.81250000 | 0.03125000 | 0.56906120  | -0.08625908  | -57.77201416 | -57.77201416  | -6.0622916   | -0.03531960 | -0.03759850 | -11.94067408 |
| 0.81250000 | 0.06250000 | 0.52193055  | -0.27322841  | -56.76114050 | -1.02588724   | -6.07123586  | -0.07184210 | -0.07085681 | -11.95669213 |

|            |            |             |             |               |               |              |             |             |              |
|------------|------------|-------------|-------------|---------------|---------------|--------------|-------------|-------------|--------------|
| 0.81250000 | 0.09375000 | 0.46537342  | -0.43656206 | -54.93680687  | -1.90820142   | -6.08275929  | -0.11092603 | -0.11269460 | -11.95282828 |
| 0.81250000 | 0.12500000 | 0.37094742  | -0.51767902 | -52.45365756  | -2.76502947   | -6.10497590  | -0.15748339 | -0.15570804 | -11.95389402 |
| 0.81250000 | 0.15625000 | 0.37966328  | -0.58272796 | -48.43390423  | -3.98794938   | -6.12943651  | -0.20757657 | -0.20944145 | -11.93250137 |
| 0.81250000 | 0.18750000 | 0.18930618  | -0.61299067 | -44.70074258  | -5.62177745   | -6.17580219  | -0.26556142 | -0.26837204 | -11.94925085 |
| 0.81250000 | 0.21875000 | -0.15264461 | -0.71998872 | -40.97198474  | -8.37697512   | -6.25375042  | -0.33628055 | -0.33409850 | -11.94671567 |
| 0.81250000 | 0.25000000 | -0.35288017 | -0.77997038 | -35.41886248  | -11.86939811  | -6.34608642  | -0.40848389 | -0.40725901 | -11.95196043 |
| 0.81250000 | 0.28125000 | -0.75146625 | -0.80088319 | -30.22829537  | -16.37014631  | -6.50227774  | -0.48704891 | -0.48378205 | -11.95516876 |
| 0.81250000 | 0.31250000 | -1.12930869 | -0.77106786 | -24.09735375  | -22.06234437  | -6.71412529  | -0.55651258 | -0.55440537 | -11.96889221 |
| 0.81250000 | 0.34375000 | -1.63345221 | -0.88375000 | -18.24317533  | -30.72487833  | -7.03271980  | -0.58526251 | -0.57853068 | -11.95237640 |
| 0.81250000 | 0.37500000 | -2.24271200 | -1.25216483 | -13.03148584  | -44.64626337  | -7.50477700  | -0.52044729 | -0.52806600 | -11.94428070 |
| 0.81250000 | 0.40625000 | -2.70521482 | -1.89314873 | -7.75285912   | -67.44404789  | -8.37159972  | -0.39349378 | -0.38962715 | -11.93200666 |
| 0.81250000 | 0.43750000 | -3.30150451 | -3.63674033 | -8.27163636   | -123.64885695 | -10.41581794 | -0.17495505 | -0.17418065 | -11.93637896 |
| 0.81250000 | 0.46875000 | -3.80369917 | -4.63992326 | -26.45180508  | -209.38335842 | -16.65571415 | -0.53434172 | -0.20161282 | -11.93716827 |
| 0.84375000 | 0.00000000 | -0.64577901 | 0.00000000  | -75.17410508  | 0.00000000    | -7.24032493  | -0.00000000 | -0.00125948 | -11.94986126 |
| 0.84375000 | 0.03125000 | -0.84174192 | -0.22420483 | -76.14729177  | -0.03705816   | -7.22856320  | -0.02747444 | -0.02424275 | -11.95685005 |
| 0.84375000 | 0.06250000 | -0.67987112 | -0.48516814 | -73.65445216  | -0.33533411   | -7.21464252  | -0.04972751 | -0.05911690 | -11.95599466 |
| 0.84375000 | 0.09375000 | -0.84672436 | -0.70110751 | -72.66557877  | -0.64286874   | -7.22927888  | -0.08458428 | -0.08545348 | -11.95176321 |
| 0.84375000 | 0.12500000 | -0.81830027 | -0.97278754 | -69.37238565  | -1.54269481   | -7.26386242  | -0.12443952 | -0.11504720 | -11.97096667 |
| 0.84375000 | 0.15625000 | -0.75791550 | -1.12191675 | -64.88822611  | -2.32494586   | -7.27719179  | -0.16462255 | -0.16772385 | -11.94487174 |
| 0.84375000 | 0.18750000 | -0.60728733 | -1.20856745 | -58.76455409  | -3.38702116   | -7.29097412  | -0.21727688 | -0.22509822 | -11.98784585 |
| 0.84375000 | 0.21875000 | -0.73652933 | -1.29254760 | -53.70232179  | -5.22200355   | -7.36982778  | -0.28870619 | -0.28982782 | -12.01035489 |
| 0.84375000 | 0.25000000 | -0.85967245 | -1.37144579 | -47.51727487  | -8.01218923   | -7.42168796  | -0.37117322 | -0.36125298 | -12.02992839 |
| 0.84375000 | 0.28125000 | -0.83278165 | -1.32277180 | -39.16871954  | -11.32539371  | -7.55616113  | -0.46806197 | -0.46729693 | -12.06793581 |
| 0.84375000 | 0.31250000 | -1.09870478 | -1.25781882 | -31.95906005  | -16.06279348  | -7.74241703  | -0.57792587 | -0.58272469 | -12.12260271 |
| 0.84375000 | 0.34375000 | -1.47436509 | -1.27661465 | -24.75173228  | -23.49961169  | -8.06001015  | -0.67786886 | -0.67768486 | -12.29144292 |
| 0.84375000 | 0.37500000 | -1.98940269 | -1.37205666 | -18.16617875  | -34.62348932  | -8.52365021  | -0.68731209 | -0.68207478 | -12.64185544 |
| 0.84375000 | 0.40625000 | -2.38314038 | -1.69762891 | -10.93879180  | -53.36040576  | -9.32933945  | -0.57928599 | -0.58704076 | -13.38467804 |
| 0.84375000 | 0.43750000 | -2.89440183 | -2.69184732 | -8.16741844   | -94.98617439  | -11.17426536 | -0.32297714 | -0.31960301 | -14.91902704 |
| 0.84375000 | 0.46875000 | -2.96075430 | -4.48079316 | -14.34015428  | -188.32009774 | -17.23152660 | 0.16280740  | -0.48393210 | -19.74132190 |
| 0.87500000 | 0.00000000 | -2.85849403 | 0.00000000  | -106.29240892 | 0.00000000    | -9.00894957  | 0.00000000  | 0.00023386  | -17.84767699 |
| 0.87500000 | 0.03125000 | -2.62817386 | -0.37739764 | -103.68269540 | -0.08088400   | -8.97529994  | -0.02087391 | -0.02321200 | -17.73583522 |
| 0.87500000 | 0.06250000 | -2.62330596 | -0.75455576 | -102.35820180 | -0.28408747   | -8.99317392  | -0.03439740 | -0.03889179 | -17.74271864 |
| 0.87500000 | 0.09375000 | -2.49197706 | -1.09301073 | -99.03029150  | -0.49604466   | -9.01649965  | -0.05100935 | -0.06314261 | -17.80811000 |
| 0.87500000 | 0.12500000 | -2.43229609 | -1.35422752 | -95.38319307  | -0.59676522   | -9.01852936  | -0.08161062 | -0.08276369 | -17.81048558 |
| 0.87500000 | 0.15625000 | -2.05179567 | -1.56677602 | -87.84810959  | -0.85407365   | -9.01138356  | -0.11343702 | -0.11058516 | -17.82419181 |
| 0.87500000 | 0.18750000 | -1.95994926 | -1.77759035 | -81.97316828  | -1.71752924   | -9.04160813  | -0.15471871 | -0.15044910 | -17.77360814 |
| 0.87500000 | 0.21875000 | -1.87312484 | -1.91782374 | -75.06691453  | -2.97268368   | -9.06251059  | -0.21246800 | -0.21045074 | -17.82976175 |
| 0.87500000 | 0.25000000 | -1.60778597 | -1.95306122 | -65.48888942  | -4.59245792   | -9.13482636  | -0.29059238 | -0.29104622 | -17.82603168 |
| 0.87500000 | 0.28125000 | -1.52138900 | -1.90126867 | -56.32603431  | -6.88486268   | -9.24104662  | -0.39052273 | -0.39101494 | -17.72298979 |
| 0.87500000 | 0.31250000 | -1.48876465 | -1.91327599 | -46.30273790  | -11.28234710  | -9.34742092  | -0.52521531 | -0.52058717 | -17.72100351 |
| 0.87500000 | 0.34375000 | -1.58530597 | -1.75397116 | -36.37375725  | -16.61013438  | -9.62729642  | -0.68605370 | -0.68781743 | -17.76987035 |
| 0.87500000 | 0.37500000 | -1.72070945 | -1.55474301 | -25.76015454  | -24.32346836  | -10.07263290 | -0.83706785 | -0.84228793 | -17.78925266 |
| 0.87500000 | 0.40625000 | -2.06739017 | -1.60219429 | -16.86393147  | -39.08764843  | -10.85003548 | -0.84033130 | -0.83914110 | -17.85055170 |
| 0.87500000 | 0.43750000 | -2.43342688 | -2.05959811 | -9.98377093   | -70.02094534  | -12.49534761 | -0.58284841 | -0.59113240 | -17.71164682 |
| 0.87500000 | 0.46875000 | -2.51635354 | -2.34611108 | -8.23483405   | -121.02544799 | -17.22597157 | -0.08454500 | -0.04544259 | -17.67818602 |
| 0.90625000 | 0.00000000 | -5.30390443 | 0.00000000  | -155.36328648 | 0.00000000    | -11.96682363 | 0.00000000  | -0.00036547 | -17.79118861 |
| 0.90625000 | 0.03125000 | -5.16095176 | -0.48557870 | -153.12842511 | -0.35150311   | -11.95641562 | -0.01054609 | -0.00607080 | -17.70466223 |
| 0.90625000 | 0.06250000 | -5.03441971 | -0.97013412 | -150.22281974 | -0.86237906   | -11.94724364 | -0.01939663 | -0.02493706 | -17.82086029 |
| 0.90625000 | 0.09375000 | -4.81943443 | -1.33873918 | -145.58921126 | -0.83081937   | -11.96424273 | -0.03169049 | -0.03256753 | -17.77309767 |
| 0.90625000 | 0.12500000 | -4.62984784 | -1.76325882 | -140.34249329 | -1.43587837   | -11.97293098 | -0.04291334 | -0.04177007 | -17.72677688 |
| 0.90625000 | 0.15625000 | -4.24578986 | -2.04552452 | -131.69354954 | -1.28280782   | -11.97007961 | -0.06596703 | -0.05767474 | -17.77767326 |
| 0.90625000 | 0.18750000 | -3.86207470 | -2.37906388 | -122.04234269 | -2.18928030   | -11.98144342 | -0.09098780 | -0.09366129 | -17.66012933 |
| 0.90625000 | 0.21875000 | -3.32025504 | -2.49126755 | -109.42094125 | -2.34941910   | -11.97988244 | -0.13113496 | -0.12580900 | -17.87489752 |
| 0.90625000 | 0.25000000 | -3.01574616 | -2.53332069 | -98.75160797  | -2.90391002   | -12.04722739 | -0.17737110 | -0.18216649 | -17.81035743 |
| 0.90625000 | 0.28125000 | -2.49929374 | -2.55955469 | -84.04128359  | -4.45478826   | -12.07805057 | -0.25974916 | -0.25705298 | -17.74600393 |
| 0.90625000 | 0.31250000 | -2.09259469 | -2.39619420 | -69.12874863  | -6.19654981   | -12.12797298 | -0.38669747 | -0.39313144 | -17.81820453 |
| 0.90625000 | 0.34375000 | -1.81694406 | -2.19773919 | -54.40000220  | -9.86252412   | -12.29976129 | -0.57705120 | -0.57685142 | -17.86181314 |
| 0.90625000 | 0.37500000 | -1.65242342 | -1.93402366 | -39.54079918  | -15.78376634  | -12.64034521 | -0.83825513 | -0.83424446 | -17.96151358 |
| 0.90625000 | 0.40625000 | -1.66201100 | -1.60425110 | -25.57312500  | -24.85856629  | -13.38991658 | -1.11994712 | -1.12021800 | -18.47951673 |
| 0.90625000 | 0.43750000 | -1.87194947 | -1.55017975 | -14.10081650  | -45.39231137  | -14.89662392 | -1.09457892 | -1.06546532 | -19.80102336 |



|            |            |              |             |               |               |              |             |             |              |
|------------|------------|--------------|-------------|---------------|---------------|--------------|-------------|-------------|--------------|
| 0.90625000 | 0.46875000 | -2.25827659  | -2.93493898 | -11.91540406  | -120.75314066 | -19.15446439 | -0.29453679 | 0.11820105  | -24.38135657 |
| 0.93750000 | 0.00000000 | -8.48622092  | 0.00000000  | -256.24715858 | 0.00000000    | -17.85197397 | 0.00000000  | 0.01210380  | -32.08796915 |
| 0.93750000 | 0.03125000 | -9.40938643  | -0.51071757 | -271.51050684 | -0.92468583   | -17.78558261 | -0.01466203 | -0.01929126 | -31.36838537 |
| 0.93750000 | 0.06250000 | -9.05886916  | -1.23743412 | -264.48267185 | -4.23793356   | -17.86162336 | -0.00891669 | -0.01382168 | -30.92975010 |
| 0.93750000 | 0.09375000 | -8.83144630  | -1.71282706 | -257.17906977 | -5.46487976   | -17.71950710 | -0.01057362 | -0.02758216 | -30.35974164 |
| 0.93750000 | 0.12500000 | -8.46186728  | -1.98391556 | -247.94475601 | -4.69132243   | -17.71948157 | -0.00547562 | -0.05524902 | -29.08223697 |
| 0.93750000 | 0.15625000 | -7.83871249  | -2.39398357 | -232.64309846 | -5.26321899   | -17.67285104 | -0.01128052 | -0.05134304 | -32.67065892 |
| 0.93750000 | 0.18750000 | -7.00896387  | -2.64517476 | -213.24425447 | -5.11646485   | -17.73124324 | -0.04223826 | -0.01224150 | -30.57151162 |
| 0.93750000 | 0.21875000 | -6.38214639  | -3.01486926 | -196.71966509 | -7.02402218   | -17.81982719 | -0.04354013 | -0.05526516 | -30.08399942 |
| 0.93750000 | 0.25000000 | -5.45815893  | -3.19043802 | -172.65060865 | -7.49520378   | -17.66664230 | -0.07107831 | -0.08307740 | -32.20967608 |
| 0.93750000 | 0.28125000 | -4.62952203  | -3.11761624 | -149.92324860 | -6.36618942   | -17.68770650 | -0.08331042 | -0.13403677 | -30.13021177 |
| 0.93750000 | 0.31250000 | -3.72127811  | -2.89966040 | -123.87819490 | -5.35343494   | -17.71711704 | -0.19544906 | -0.18157503 | -32.44446439 |
| 0.93750000 | 0.34375000 | -2.84402721  | -2.69985427 | -96.67629804  | -6.92877454   | -17.76030913 | -0.32695107 | -0.33367845 | -31.17737452 |
| 0.93750000 | 0.37500000 | -2.24432727  | -2.31431403 | -73.10315868  | -9.24041061   | -17.95705348 | -0.59899360 | -0.58131257 | -29.45737884 |
| 0.93750000 | 0.40625000 | -1.65191039  | -1.79757626 | -47.44224567  | -13.18147226  | -18.45845818 | -1.07211668 | -1.08833689 | -27.42366287 |
| 0.93750000 | 0.43750000 | -1.42177010  | -1.35925660 | -25.79718892  | -24.44860701  | -19.77939458 | -1.61171476 | -1.62272809 | -32.09056350 |
| 0.93750000 | 0.46875000 | -1.41422283  | -1.19884618 | -10.88662554  | -55.04527381  | -24.43679868 | -1.49812971 | -1.54084180 | -32.51806379 |
| 0.96875000 | 0.00000000 | -12.01932451 | 0.00000000  | -508.30114470 | 0.00000000    | -32.33713825 | 0.00000000  | -0.21195138 | -30.12030252 |
| 0.96875000 | 0.03125000 | -13.56975719 | 0.92016386  | -488.83010578 | 20.06282710   | -27.29310988 | 0.61197470  | 0.30209950  | -32.85615349 |
| 0.96875000 | 0.06250000 | -12.46753921 | -0.99939446 | -505.91843939 | -7.69199538   | -31.25487112 | -0.07397764 | 0.18676627  | -31.67488835 |
| 0.96875000 | 0.09375000 | -11.99996869 | -1.32996837 | -476.98985380 | -10.25666666  | -30.19152032 | -0.52548791 | -0.06565998 | -30.53621146 |
| 0.96875000 | 0.12500000 | -7.83137280  | -2.53507710 | -359.68396835 | -24.38984197  | -31.48102607 | -0.40721938 | -0.09759809 | -30.85693898 |
| 0.96875000 | 0.15625000 | -9.99876526  | -0.13222371 | -424.26087013 | 19.34174519   | -31.47567364 | 0.38155348  | 0.18662796  | -31.37044907 |
| 0.96875000 | 0.18750000 | -9.45281105  | -3.13735018 | -372.13024939 | -25.91743717  | -28.39227163 | -0.13245607 | 0.15142118  | -29.06655690 |
| 0.96875000 | 0.21875000 | -7.86308226  | -2.80236720 | -342.15428409 | -18.42604356  | -31.08115442 | 0.93715712  | 0.31437628  | -30.55087493 |
| 0.96875000 | 0.25000000 | -9.77719638  | -2.80576238 | -376.88904088 | -18.15294810  | -29.10001965 | -0.31286765 | -0.33099893 | -26.36911716 |
| 0.96875000 | 0.28125000 | -3.90532168  | -6.50663917 | -207.44213958 | -76.73101687  | -31.21671320 | 0.45698196  | 0.19757415  | -25.83791499 |
| 0.96875000 | 0.31250000 | -6.80864405  | -4.39667034 | -271.86735511 | -37.86327786  | -28.85350159 | 1.07763958  | 0.38522157  | -28.70245842 |
| 0.96875000 | 0.34375000 | -4.82636980  | -4.36446976 | -211.25321348 | -40.63633607  | -30.64812752 | 0.93470434  | 0.62468626  | -27.50861758 |
| 0.96875000 | 0.37500000 | -2.55566825  | -2.36590938 | -128.49134022 | -7.83594472   | -30.19860399 | 0.47136628  | 0.16007657  | -29.40227361 |
| 0.96875000 | 0.40625000 | -1.48044249  | -1.85779386 | -82.67316362  | -5.83026973   | -30.45104204 | -0.84281564 | -0.71854832 | -28.69226254 |
| 0.96875000 | 0.43750000 | -1.98691941  | -1.83234037 | -79.98229326  | -19.88907803  | -31.30697061 | -1.31225592 | -1.49353143 | -31.24311775 |
| 0.96875000 | 0.46875000 | -0.57505793  | -0.55540245 | -10.94585502  | -12.30606031  | -33.37620788 | -2.63045826 | -2.40495714 | -33.58656538 |
